# Supplementary material for: Phosphorescent 2-phenylbenzothiazole PtIV bis-cyclometalated complexes with phenanthroline-based ligands
Source: Royal Society of Chemistry journal article supplement (doi:10.1039/d3dt00801k), 2023-01-01
Supplement: d3dt00801k1.pdf [file d3dt00801k1.pdf]

## Electronic Supporting Information

### Phosphorescent 2-phenylbenzothiazole Pt<sup>IV</sup> bis-cyclometalated complexes with phenanthroline-based ligands

Andrea Corral-Zorzano, David Gómez de Segura, Elena Lalinde\* and M<sup>a</sup> Teresa Moreno\*

Departamento de Química-Centro de Síntesis Química de La Rioja, (CISQ), Universidad de La Rioja, 26006, Logroño, Spain. E-mail: [elena.lalinde@unirioja.es](mailto:elena.lalinde@unirioja.es); [teresa.moreno@unirioja.es](mailto:teresa.moreno@unirioja.es)

| Contents:                                                      | Page |
|----------------------------------------------------------------|------|
| 1.- Experimental Section.....                                  | S2   |
| 2.- NMR Spectra.....                                           | S9   |
| 3.- Crystal Structures.....                                    | S23  |
| 4.- Photophysical Properties and Theoretical calculations..... | S28  |
| 5.- Electrochemical Properties.....                            | S46  |

## 1. Experimental Section

**General Comments.** All reactions were carried out under an atmosphere of dry nitrogen, using standard Schlenk techniques. Solvents were obtained from a solvent purification system (M-BRAUN MS SPS-800). Elemental analyses were carried out with a EA FLASH 2000 (Thermo Fisher Scientific) microanalyzer. Mass spectra were recorded on a Microflex MALDI-TOF Bruker (MALDI) spectrometer operating in the linear and reflector modes using dithranol as the matrix. IR spectra were obtained on a Fourier Transform Perkin Elmer Spectrum UATR Two spectrophotometer, with the diamond crystal ATR attachment, which covers the region between 4000 and 450  $\text{cm}^{-1}$ ; data processing was carried out with Omnic. NMR spectra were recorded on a Bruker AVANCE ARX 400 spectrometer at 298 K. Chemical shifts are reported in parts per million (ppm) relative to external standards ( $\text{SiMe}_4$  for  $^1\text{H}$  and  $^{13}\text{C}\{^1\text{H}\}$  and  $\text{CFCl}_3$  for  $^{19}\text{F}\{^1\text{H}\}$ ) and all coupling constants are given in hertz (Hz). The UV-Vis absorption spectra were measured with a Hewlett Packard 8453 spectrophotometer. Excitation and emission spectra were obtained with a Shimadzu RF-60000 and Edimburg FLS 1000 spectrofluorimeters. Lifetime measurements were performed with Edimburg FLS 1000 spectrofluorimeter with  $\mu\text{F}2$  pulse lamp (Power: 100 W, Fuse: 3.15 Amp A/S); the estimated uncertainty is  $\pm 10\%$  or better. Quantum Yields were measured with Hamamatsu Absolute PL Quantum Yield Spectrometer; the estimated uncertainty is  $\pm 5\%$  or better. Cyclic voltammograms were registered on a potentiostat Voltalab PST 050 with the CV cell consisting of a platinum disk as working electrode, a Pt wire counter electrode and an Ag/AgCl reference electrode. The measurements were carried out at 298 K under  $\text{N}_2$  atmosphere, using degassed  $5 \times 10^{-4}$  M solutions of the complexes in dry  $\text{CH}_2\text{Cl}_2$  and 0.1 M  $(\text{NBu}_4)\text{PF}_6$  as the supporting electrolyte. The ferrocene/ferricinium couple served as the internal reference (+0.45 V vs Ag/AgCl).  $\text{PhICl}_2$  was prepared according to the published procedure.<sup>1</sup>

Complex  $[\text{Pt}(\text{pbt})(\text{Hpbt}-\kappa\text{N})\text{Cl}]$  (**1**) was synthesized following the published procedure<sup>2</sup> and was fully characterized. Elem. Anal. Calcd for  $\text{C}_{26}\text{H}_{17}\text{N}_2\text{ClPtS}_2$  (652.09): C, 47.89; H, 2.63; N, 4.30; S, 9.83. Found: C, 47.58; H, 2.76; N, 4.78; S, 10.31. MALDI (+):  $m/z$  (%): 616.019  $[\text{M}-\text{Cl}]^+$  (100), 651.962  $[\text{M}]^+$  (26). IR ( $\text{cm}^{-1}$ ):  $\nu(\text{Pt}-\text{Cl})$  332 (w),  $\nu(\text{Pt}-\text{N})$  436 (w).  $^1\text{H}$  NMR (400 MHz,  $\text{CDCl}_3$ ):  $\delta$  9.94 (d,  $^3J_{\text{H}-\text{H}} = 8.5$ ,  $\text{H}^7$ ), 9.12 (d,  $^3J_{\text{H}-\text{H}} = 8.5$ ,  $\text{H}^7$ ), 8.70 (d, 2H,  $^3J_{\text{H}-\text{H}} = 7.6$ ,  $\text{H}^8$ ), 7.93 (d,  $^3J_{\text{H}-\text{H}} = 8.5$ ,  $\text{H}^4$ ), 7.79 (m,  $\text{H}^{10}$ ), 7.53 – 7.60 (m, 5H,

H<sup>5,6,4'-6'</sup>), 7.41 – 7.51 (m, 3H, H<sup>9,8</sup>), 6.99 (t, <sup>3</sup>J<sub>H-H</sub> = 7.5, H<sup>9</sup>), 6.77 (t, <sup>3</sup>J<sub>H-H</sub> = 7.5, H<sup>10</sup>), 6.07 (d, <sup>3</sup>J<sub>H-H</sub> = 8, <sup>3</sup>J<sub>Pt-H</sub> = 46.5, H<sup>11</sup>).

**Synthesis of *cis*-[Pt(pbt)<sub>2</sub>Cl<sub>2</sub>] (2).** To a yellow suspension of **1** (0.190 g, 0.292 mmol) in 30 mL of CH<sub>2</sub>Cl<sub>2</sub> at 0 °C, PhICl<sub>2</sub> (0.105 g, 0.379 mmol) was added. After 6 h of stirring, the solvent was evaporated to dryness and the residue treated with Et<sub>2</sub>O (15 mL) to obtain **2** as a pale-yellow solid (0.185 g, 93 %). Elem. Anal. Calcd for C<sub>26</sub>H<sub>16</sub>Cl<sub>2</sub>N<sub>2</sub>PtS<sub>2</sub> (686,53): C, 45.49; H, 2.35; N, 4.08; S, 9.34. Found: C, 45.01; H, 2.47; N, 3.98; S, 8.94. MALDI (+): *m/z* (%) 651.088 [M-Cl]<sup>+</sup> (100), 709.098 [M+Na]<sup>+</sup> (18). IR (cm<sup>-1</sup>): ν(Pt-Cl) 332 (m), ν(Pt-N) 461(m). <sup>1</sup>H NMR (400 MHz, DMSO-d<sub>6</sub>): δ 9.84 (d, <sup>3</sup>J<sub>H-H</sub> = 8.5, H<sup>7</sup>), 8.45 (d, <sup>3</sup>J<sub>H-H</sub> = 8.3, H<sup>4</sup>), 7.99 (d, <sup>3</sup>J<sub>H-H</sub> = 7.6, H<sup>8</sup>), 7.79 – 7.71 (m, 2H, H<sup>5,6</sup>), 7.24 (t, <sup>3</sup>J<sub>H-H</sub> = 7.6, H<sup>9</sup>), 7.05 (t, <sup>3</sup>J<sub>H-H</sub> = 7.6, H<sup>10</sup>), 6.16 (d, <sup>3</sup>J<sub>H-H</sub> = 8.1, <sup>3</sup>J<sub>Pt-H</sub> = 31.4, H<sup>11</sup>).

**Synthesis of *cis*-[Pt(pbt)<sub>2</sub>(OCOCF<sub>3</sub>)<sub>2</sub>] (3).** A mixture of **2** (0.264 g, 0.384 mmol) and silver trifluoroacetate (0.180 g, 0.814 mmol) was refluxed in 40 mL of acetone. After 6 h, the suspension was filtered through celite and the filtrate was evaporated to dryness. The residue was dissolved in 2 mL of CHCl<sub>3</sub> and treated with *n*-hexane (10 mL) to obtain **3** as a pale-yellow solid (0.192 g, 59 %). Elem. Anal. Calcd for C<sub>30</sub>H<sub>16</sub>F<sub>6</sub>N<sub>2</sub>O<sub>4</sub>PtS<sub>2</sub> (841,66): C, 42.81; H, 1.92; N, 3.33; S, 7.62. Found: C, 42.37; H, 1.87; N, 3.20; S, 7.65. MALDI (+): *m/z* (%) 616.039 [M-2CF<sub>3</sub>CO<sub>2</sub>]<sup>+</sup> (68), 728.040 [M-CF<sub>3</sub>CO<sub>2</sub>]<sup>+</sup> (100), 865.220 [M+Na]<sup>+</sup> (20). IR (cm<sup>-1</sup>): ν(Pt-N) 451 (m), ν(CO) 1699 (s). <sup>1</sup>H NMR (400 MHz, CDCl<sub>3</sub>): δ 9.36 (d, <sup>3</sup>J<sub>H-H</sub> = 8.5, H<sup>7</sup>), 8.00 (d, <sup>3</sup>J<sub>H-H</sub> = 8.2, H<sup>4</sup>), 7.70 (t, <sup>3</sup>J<sub>H-H</sub> = 7.7, H<sup>6</sup>), 7.63 (m, 2H, H<sup>8,5</sup>), 7.19 (t, <sup>3</sup>J<sub>H-H</sub> = 7.5, H<sup>9</sup>), 6.93 (t, <sup>3</sup>J<sub>H-H</sub> = 7.9, H<sup>10</sup>), 6.09 (d, <sup>3</sup>J<sub>H-H</sub> = 7.9, <sup>3</sup>J<sub>Pt-H</sub> = 32.5, H<sup>11</sup>). <sup>13</sup>C {<sup>1</sup>H} NMR (100.6 MHz, CDCl<sub>3</sub>): δ 179.6 (s, *J*<sub>Pt-C</sub> = 90.6, C<sup>2</sup>), 168.8 (c, *J*<sub>C-F</sub> = 37, CO), 147.9 (s, *J*<sub>Pt-C</sub> = 33.1, C<sup>7a</sup>), 137.9 (s, *J*<sub>Pt-C</sub> = 21.8, C<sup>13</sup>), 133.1 (s, *J*<sub>Pt-C</sub> = 39.5, C<sup>10</sup>), 130.7 (s, *J*<sub>Pt-C</sub> = 805, C<sup>12</sup>), 130.0 (s, *J*<sub>Pt-C</sub> = 35.6, C<sup>3a</sup>), 129.2 (s, C<sup>6</sup>), 128.4 (s, *J*<sub>Pt-C</sub> = 26.4, C<sup>11</sup>), 127.4 (m, C<sup>8,9</sup>), 126.8 (s, *J*<sub>Pt-C</sub> = 26.8, C<sup>5</sup>), 122.7 (s, C<sup>4</sup>), 122.1 (s, C<sup>7</sup>), 116.4 (c, *J*<sub>C-F</sub> = 292, CF<sub>3</sub>). <sup>19</sup>F {<sup>1</sup>H} NMR (282.4 MHz, CDCl<sub>3</sub>): δ -74.9 (s, <sup>4</sup>*J*<sub>Pt-F</sub> = 4.6 Hz).

**Synthesis of [Pt(pbt)<sub>2</sub>(phen)](CF<sub>3</sub>CO<sub>2</sub>)<sub>2</sub> (4-CF<sub>3</sub>CO<sub>2</sub>).** 1,10-phenanthroline (0.022 g, 0.123 mmol) was added to a solution of **3** (0.102 g, 0.121 mmol) in 15 mL of CH<sub>2</sub>Cl<sub>2</sub> and the solution was stirred for 3 h. Then, the solvent was removed to 2 mL and treated with *n*-hexane (10 mL) to obtain **4-CF<sub>3</sub>CO<sub>2</sub>** as a pale-orange solid (0.101 g, 77 %). Elem. Anal. Calcd for C<sub>42</sub>H<sub>24</sub>F<sub>6</sub>N<sub>4</sub>O<sub>4</sub>PtS<sub>2</sub> (1021,87): C, 49.37; H, 2.37; N, 5.48; S, 6.27. Found: C, 49.89; H, 2.23; N, 4.98; S, 5.73. MALDI (+): *m/z* (%) 903.029 [M-CF<sub>3</sub>CO<sub>2</sub>]<sup>+</sup> (32),

795.108 [M-2CF<sub>3</sub>CO<sub>2</sub>]<sup>+</sup> (19), 728.014 [M-phen-CF<sub>3</sub>CO<sub>2</sub>]<sup>+</sup> (55), 585.059 [M-pbt-2CF<sub>3</sub>CO<sub>2</sub>]<sup>+</sup> (100). IR (cm<sup>-1</sup>): ν(Pt-N) 453 (m), ν(CO) 1699 (s). <sup>1</sup>H NMR (400 MHz, CDCl<sub>3</sub>): δ 9.36 (d, <sup>3</sup>J<sub>H-H</sub> = 8.4, H<sup>7</sup>), 9.17 (d, <sup>3</sup>J<sub>H-H</sub> = 4.1, H<sup>1'</sup>), 8.33 (d, <sup>3</sup>J<sub>H-H</sub> = 8.3, H<sup>3'</sup>), 7.99 (d, <sup>3</sup>J<sub>H-H</sub> = 7.9, H<sup>4</sup>), 7.87 (s, H<sup>5'</sup>), 7.71 (m, 2H, H<sup>6,2'</sup>), 7.62 (m, 2H, H<sup>8</sup>, H<sup>5</sup>), 7.18 (t, <sup>3</sup>J<sub>H-H</sub> = 7.4, H<sup>9</sup>), 6.93 (t, <sup>3</sup>J<sub>H-H</sub> = 7.7, H<sup>10</sup>), 6.1 (d, <sup>3</sup>J<sub>H-H</sub> = 7.9, <sup>3</sup>J<sub>Pt-H</sub> = 32.6, H<sup>11</sup>). <sup>13</sup>C{<sup>1</sup>H} NMR (100.6 MHz, CDCl<sub>3</sub>): δ 179.5 (s, <sup>3</sup>J<sub>Pt-C</sub> = 91.3, C<sup>2</sup>), 168.8 (c, J<sub>C-F</sub> = 37, CO), 150.6 (s, C<sup>1'</sup>), 147.8 (s, <sup>3</sup>J<sub>Pt-C</sub> = 32.9, C<sup>7a</sup>), 145.5 (s, C<sup>12'</sup>), 137.8 (s, <sup>3</sup>J<sub>Pt-C</sub> = 21.7, C<sup>13</sup>), 136.6 (s, C<sup>3'</sup>), 132.9 (s, <sup>3</sup>J<sub>Pt-C</sub> = 39.5, C<sup>10</sup>), 130.6 (s, C<sup>12</sup>), 129.9 (s, <sup>3</sup>J<sub>Pt-C</sub> = 36.9, C<sup>3a</sup>), 129.1 (s, C<sup>6</sup>), 128.9 (s, C<sup>4'</sup>), 128.3 (s, <sup>3</sup>J<sub>Pt-C</sub> = 26.3, C<sup>11</sup>), 127.3 (s, C<sup>8,9</sup>), 126.8 (s, C<sup>5</sup>), 126.7 (s, C<sup>5'</sup>), 123.6 (s, C<sup>2</sup>), 122.6 (s, C<sup>4</sup>), 122.0 (s, C<sup>7</sup>), 116.4 (c, J<sub>C-F</sub> = 292, CF<sub>3</sub>). <sup>19</sup>F{<sup>1</sup>H} NMR (376.5 MHz, CDCl<sub>3</sub>): δ -74.9 (s, -CF<sub>3</sub>).

**Synthesis of [Pt(pbt)<sub>2</sub>(pyraphen)](CF<sub>3</sub>CO<sub>2</sub>)<sub>2</sub> (5-CF<sub>3</sub>CO<sub>2</sub>).** This complex was obtained as a pale-orange solid (0.104 g, 75 %) following the same procedure as 5-CF<sub>3</sub>CO<sub>2</sub> starting from **3** (0.102 g, 0.121 mmol) and pyrazino[2,3-*f*][1,10]-phenanthroline (0.029 g, 0.121 mmol). Elem. Anal. Calcd for C<sub>44</sub>H<sub>24</sub>F<sub>6</sub>N<sub>6</sub>O<sub>4</sub>PtS<sub>2</sub> (1073,91): C, 49.21; H, 2.25; N, 7.83; S, 5.97. Found: C, 49.09; H, 2.20; N, 7.83; S, 5.48. MALDI (+): *m/z* (%) 847.135 [M-2CF<sub>3</sub>CO<sub>2</sub>]<sup>+</sup> (55), 728.022 [M-pyraphen-CF<sub>3</sub>CO<sub>2</sub>]<sup>+</sup> (69), 637.069 [M-pbt-2CF<sub>3</sub>CO<sub>2</sub>]<sup>+</sup> (100), 571.029 [M-pyraphen-2CF<sub>3</sub>CO<sub>2</sub>]<sup>+</sup> (55). IR (cm<sup>-1</sup>): ν(Pt-N) 442(m), ν(CO) 1697 (s). <sup>1</sup>H NMR (400 MHz, CDCl<sub>3</sub>): δ 9.50 (d, <sup>3</sup>J<sub>H-H</sub> = 8.3, H<sup>3'</sup>), 9.35 (d, <sup>3</sup>J<sub>H-H</sub> = 8.7, H<sup>7</sup>), 9.30 (d, <sup>3</sup>J<sub>H-H</sub> = 4.2, H<sup>1'</sup>), 8.99 (s, H<sup>6</sup>), 7.98 (d, <sup>3</sup>J<sub>H-H</sub> = 8.1, H<sup>4</sup>), 7.81 (dd, <sup>3</sup>J<sub>H-H</sub> = 8.1, 4.2, H<sup>2'</sup>), 7.69 (t, <sup>3</sup>J<sub>H-H</sub> = 7.6, H<sup>6</sup>), 7.62 (m, H<sup>8</sup>, H<sup>5</sup>), 7.18 (t, <sup>3</sup>J<sub>H-H</sub> = 7.4, H<sup>9</sup>), 6.92 (t, <sup>3</sup>J<sub>H-H</sub> = 7.8, H<sup>10</sup>), 6.08 (d, <sup>3</sup>J<sub>H-H</sub> = 8.8, <sup>3</sup>J<sub>Pt-H</sub> = 32.5, H<sup>11</sup>). <sup>13</sup>C{<sup>1</sup>H} NMR (100.6 MHz, CDCl<sub>3</sub>): δ 179.6 (s, <sup>3</sup>J<sub>Pt-C</sub> = 90, C<sup>2</sup>), 168.8 (c, J<sub>C-F</sub> = 37, CO), 152.5 (s, C<sup>1'</sup>), 147.8 (s, <sup>3</sup>J<sub>Pt-C</sub> = 30.9, C<sup>7a</sup>), 147.6 (s, C<sup>12'</sup>), 144.7 (s, C<sup>6</sup>), 140.7 (s, C<sup>5</sup>), 137.9 (s, <sup>3</sup>J<sub>Pt-C</sub> = 21.6, C<sup>13</sup>), 133.4 (s, C<sup>3'</sup>), 133.1 (s, <sup>3</sup>J<sub>Pt-C</sub> = 39.1, C<sup>10</sup>), 130.7 (s, <sup>1</sup>J<sub>Pt-C</sub> ~780, C<sup>12</sup>), 130.0 (s, <sup>3</sup>J<sub>Pt-C</sub> = 36.5, C<sup>3a</sup>), 129.2 (s, C<sup>6</sup>), 128.4 (s, <sup>3</sup>J<sub>Pt-C</sub> = 26.3, C<sup>11</sup>), 127.4 (m, C<sup>8,9</sup>), 127.2 (s, C<sup>4</sup>), 126.8 (s, <sup>3</sup>J<sub>Pt-C</sub> = 27.2, C<sup>5</sup>), 124.2 (s, C<sup>2</sup>), 122.7 (s, C<sup>4</sup>), 122.1 (s, C<sup>7</sup>), 116.4 (c, J<sub>C-F</sub> = 292, CF<sub>3</sub>). <sup>19</sup>F{<sup>1</sup>H} NMR (376.5 MHz, CDCl<sub>3</sub>): δ -74.9 (s, -CF<sub>3</sub>).

**Synthesis of [Pt(pbt)<sub>2</sub>(NH<sub>2</sub>-phen)](CF<sub>3</sub>CO<sub>2</sub>)<sub>2</sub> (6-CF<sub>3</sub>CO<sub>2</sub>).** 5-amine-1,10-phenanthroline (0.018 g, 0.093 mmol) dissolved in *i*PrOH (10 mL) was added to a solution of **3** (0.076 g, 0.091 mmol) in 20 mL of CH<sub>2</sub>Cl<sub>2</sub> and the mixture was refluxed for 48 h. Then, the suspension was evaporated to dryness and the residue was extracted with acetone (20 mL) and filtered through celite. The filtrate was evaporated to dryness and

the oil was treated with Et<sub>2</sub>O (4 x 5 mL) to obtain **6-CF<sub>3</sub>CO<sub>2</sub>** as a dark-orange solid (0.068 g, 73 %). Elem. Anal. Calcd for C<sub>42</sub>H<sub>25</sub>F<sub>6</sub>N<sub>5</sub>O<sub>4</sub>PtS<sub>2</sub> (1036,89): C, 48.65; H, 2.43; N, 6.75; S, 6.18. Found: C, 48.25; H, 2.72; N, 6.94; S, 5.90. MALDI (+): *m/z* (%) 810.109 [M-2CF<sub>3</sub>CO<sub>2</sub>]<sup>+</sup> (100), 600.040 [M-pbt-2CF<sub>3</sub>CO<sub>2</sub>]<sup>+</sup> (49). IR (cm<sup>-1</sup>): ν(Pt-N) 451 (m), ν(CO) 1687 (s). <sup>1</sup>H NMR (400 MHz, CD<sub>3</sub>COCD<sub>3</sub>): δ 9.98 (d, <sup>3</sup>*J*<sub>H-H</sub> = 8.4, H<sup>8''</sup>), 8.78 (d, <sup>3</sup>*J*<sub>H-H</sub> = 5.3, <sup>3</sup>*J*<sub>Pt-H</sub> = 15.1 H<sup>10''</sup>), 8.64 (d, <sup>3</sup>*J*<sub>H-H</sub> = 8.4, H<sup>3''</sup>), 8.40 – 8.34 (m, 4H, H<sup>8,8',4,4'</sup>), 8.29 (d, <sup>3</sup>*J*<sub>H-H</sub> = 5.3, <sup>3</sup>*J*<sub>Pt-H</sub> = 15.4, H<sup>1''</sup>), 8.19 (dd, <sup>3</sup>*J*<sub>H-H</sub> = 8.4, <sup>3</sup>*J*<sub>H-H</sub> = 5.3, H<sup>9''</sup>), 7.96 (dd, <sup>3</sup>*J*<sub>H-H</sub> = 8.4, <sup>3</sup>*J*<sub>H-H</sub> = 5.3, H<sup>2''</sup>), 7.69 (s br, NH<sub>2</sub>), 7.62 (2 t, <sup>3</sup>*J*<sub>H-H</sub> = 7.4, H<sup>9,9'</sup>), 7.46 (2 t, <sup>3</sup>*J*<sub>H-H</sub> = 7.4, H<sup>5,5'</sup>), 7.39 (s, H<sup>6''</sup>), 7.34 (2 t, <sup>3</sup>*J*<sub>H-H</sub> = 7.4, H<sup>10,10'</sup>), 7.17 (2 t, <sup>3</sup>*J*<sub>H-H</sub> = 7.4, H<sup>6,6'</sup>), 6.68, 6.64 (2d, <sup>3</sup>*J*<sub>H-H</sub> = 8, <sup>3</sup>*J*<sub>Pt-H</sub> = 28.8, H<sup>11,11'</sup>), 6.06 (d, <sup>3</sup>*J*<sub>H-H</sub> = 8.6, H<sup>7</sup>), 5.97 (d, <sup>3</sup>*J*<sub>H-H</sub> = 8.6, H<sup>7'</sup>). <sup>13</sup>C{<sup>1</sup>H} NMR (100.6 MHz, CD<sub>3</sub>COCD<sub>3</sub>): δ 182.6, 182.3 (2 s, <sup>2</sup>*J*<sub>Pt-C</sub> = 75, C<sup>2,2'</sup>), 151.3 (s, <sup>3</sup>*J*<sub>Pt-C</sub> = 18.2, C<sup>10''</sup>), 148.6 (s, C<sup>12''</sup>), 147.4 (s, C<sup>5''</sup>), 146.0 (2 s, <sup>3</sup>*J*<sub>Pt-C</sub> = 34.8, C<sup>7a,7a'</sup>), 145.3 (s, <sup>3</sup>*J*<sub>Pt-C</sub> = 17.4, C<sup>1''</sup>), 141.0 (s, C<sup>8''</sup>), 140.0 (s, C<sup>3''</sup>), 139.4 (s, C<sup>11''</sup>), 138.1, 137.9 (2 s, <sup>3</sup>*J*<sub>Pt-C</sub> = 17.4, C<sup>3a,3a'</sup>), 137.3, 137.0 (2 s, C<sup>12,12'</sup>), 136.1 (2 s, <sup>3</sup>*J*<sub>Pt-C</sub> = 34.8, C<sup>10,10'</sup>), 136.0 (s, C<sup>4''</sup>), 132.5, 132.3 (C<sup>13,13'</sup>), 130.8, 130.7, 130.6, 130.5 (4 s, C<sup>11,11',6,6'</sup>), 103.2 – 130.1 (4 s, C<sup>9,9',8,8'</sup>), 128.8 (s, <sup>3</sup>*J*<sub>Pt-C</sub> = 17.1, C<sup>2''</sup>), 128.5 (2 s, C<sup>5,5'</sup>), 128 (s, <sup>3</sup>*J*<sub>Pt-C</sub> = 17.1, C<sup>9''</sup>), 126.4 – 126.3 (2 s, C<sup>7',4,4'</sup>), 117.3 (s, C<sup>7,7'</sup>), 103.3 (s, C<sup>6''</sup>). <sup>19</sup>F{<sup>1</sup>H} NMR (376.5 MHz, CD<sub>3</sub>COCD<sub>3</sub>): δ = -74.9 (s, -CF<sub>3</sub>).

**Synthesis of [Pt(pbt)<sub>2</sub>(phen)](PF<sub>6</sub>)<sub>2</sub> (4-PF<sub>6</sub>).** A suspension of [Pt(pbt)<sub>2</sub>Cl<sub>2</sub>] (**2**) (0.1412 g, 0.205 mmol), 1,10-phenanthroline (0.0744 g, 0.411 mmol), TIPF<sub>6</sub> (0.8740 g, 0.823 mmol) and an excess of KClO<sub>4</sub> (0.8521 g, 6.15 mmol) were refluxed in 25 mL of 1,2-dichloroethane for 14 h. Then, the solvent was removed under reduced pressure, the residue treated with CH<sub>2</sub>Cl<sub>2</sub> (80 mL) and filtered through celite. The filtrate was evaporated to dryness and treated consecutively with <sup>i</sup>PrOH (2 mL) and Et<sub>2</sub>O (10 mL) to obtain **4-PF<sub>6</sub>** as a pale pink solid (0.171 g, 77 %). Elem. Anal. Calcd for C<sub>38</sub>H<sub>24</sub>F<sub>12</sub>N<sub>4</sub>P<sub>2</sub>PtS<sub>2</sub> (1085.77): C, 42.04; H, 2.23; N, 5.16; S, 5.91. Found: C 41.84; H 2.34; N 4.86; S 5.45. MALDI (+): *m/z* (%) 939.268 [M-PF<sub>6</sub>]<sup>+</sup> (46), 794.262 [M-2PF<sub>6</sub>]<sup>+</sup> (100), 614.030 [M-phen-2PF<sub>6</sub>]<sup>+</sup> (27), 584.096 [M-pbt-2PF<sub>6</sub>]<sup>+</sup> (34). IR (cm<sup>-1</sup>): ν(Pt-N) 453 (m), ν(PF<sub>6</sub>) 837, 557 (s). <sup>1</sup>H NMR (400 MHz, CD<sub>3</sub>COCD<sub>3</sub>): δ 9.27 (d, <sup>3</sup>*J*<sub>H-H</sub> = 8.4, H<sup>3'</sup>), 8.95 (d, <sup>3</sup>*J*<sub>H-H</sub> = 5.3, <sup>3</sup>*J*<sub>Pt-H</sub> = 15.3, H<sup>1'</sup>), 8.54 (s, H<sup>5'</sup>), 8.39 (m, H<sup>8</sup>, H<sup>2'</sup>, H<sup>4</sup>), 7.68 (t, <sup>3</sup>*J*<sub>H-H</sub> = 7.8, H<sup>9</sup>), 7.50 (t, <sup>3</sup>*J*<sub>H-H</sub> = 7.7, H<sup>5</sup>), 7.39 (t, <sup>3</sup>*J*<sub>H-H</sub> = 7.9, H<sup>10</sup>), 7.15 (t, <sup>3</sup>*J*<sub>H-H</sub> = 8.3, H<sup>6</sup>), 6.73 (d, <sup>3</sup>*J*<sub>H-H</sub> = 8.0, <sup>3</sup>*J*<sub>Pt-H</sub> = 28.7, H<sup>11</sup>), 5.99 (d, <sup>3</sup>*J*<sub>H-H</sub> = 8.6, H<sup>7</sup>). <sup>13</sup>C{<sup>1</sup>H} NMR (100.6 MHz, CD<sub>3</sub>COCD<sub>3</sub>): δ 182.6 (s, <sup>2</sup>*J*<sub>Pt-H</sub> = 76.8, C<sup>2</sup>), 152.2 (s, <sup>3</sup>*J*<sub>Pt-C</sub> = 17.5, C<sup>1'</sup>), 146.6 (s, C<sup>4'</sup>),

146.0 (s,  $^3J_{Pt-C} = 37.6$ , C<sup>3a</sup>), 144.3 (s, C<sup>3'</sup>), 138.0 (s,  $^3J_{Pt-C} = 17.8$ , C<sup>13</sup>), 136.6 (s, C<sup>12</sup>), 136.4 (s,  $^3J_{Pt-C} = 35$ , C<sup>10</sup>), 133.7 (s,  $^3J_{Pt-C} = 8.8$ , C<sup>12'</sup>), 132.3 (s,  $^3J_{Pt-C} = 35.4$ , C<sup>7a</sup>), 130.8 (s, C<sup>11</sup>), 130.7 (s, C<sup>6</sup>), 130.5 (s, C<sup>9</sup>), 130.4 (s, C<sup>5'</sup>), 130.4 (s, C<sup>2'</sup>), 130.0 (s,  $^3J_{Pt-C} = 16.8$ , C<sup>8</sup>), 128.7 (s, C<sup>5</sup>), 126.2 (s, C<sup>4</sup>), 117.3 (s, C<sup>7</sup>).  $^{19}F\{^1H\}$  NMR (376.5 MHz, CD<sub>3</sub>COCD<sub>3</sub>):  $\delta$  -72.5 (d,  $^1J_{F-P} = 709$ , PF<sub>6</sub>).  $^{31}P\{^1H\}$  NMR (161.9 MHz, CD<sub>3</sub>COCD<sub>3</sub>):  $\delta$  -144.3 (sept,  $^1J_{P-F} = 709$ , PF<sub>6</sub>).

**Synthesis of [Pt(pbt)<sub>2</sub>(pyraphen)](PF<sub>6</sub>)<sub>2</sub> (5-PF<sub>6</sub>).** A suspension of [Pt(pbt)<sub>2</sub>Cl<sub>2</sub>] (**2**) (0.1426 g, 0.208 mmol), pyrazino[2,3-*f*][1,10]-phenanthroline (0.0581 g, 0.249 mmol), TIPF<sub>6</sub> (0.1755 g, 0.498 mmol) and an excess KClO<sub>4</sub> (0.8646 g, 6.24 mmol) were refluxed in 10 mL of 1,2-dichloroethane for 24 h. Then, the solvent was removed, the residue treated with CH<sub>3</sub>CN (20 mL) and filtered through celite. The filtrate was evaporated to dryness and treated with *n*-hexane (10 mL) to give **5-PF<sub>6</sub>** as a white solid (0.180 g, 74 %). Elem. Anal. Calcd for C<sub>40</sub>H<sub>24</sub>F<sub>12</sub>N<sub>6</sub>P<sub>2</sub>PtS<sub>2</sub> (1137.81): C, 42.23; H, 2.13; N, 7.39; S, 5.64. Found: C 42.59; H 2.61; N 7.06; S 5.70. MALDI (+): *m/z* (%) 991.137 [M-PF<sub>6</sub>]<sup>+</sup> (35), 846.135 [M-2PF<sub>6</sub>]<sup>+</sup> (100), 613.914 [M-pyraphen-2PF<sub>6</sub>]<sup>+</sup> (19). IR (cm<sup>-1</sup>):  $\nu$ (Pt-N) 487 (m),  $\nu$ (PF<sub>6</sub>) 839, 555 (s).  $^1H$  NMR (400 MHz, CD<sub>3</sub>COCD<sub>3</sub>):  $\delta$  10.09 (d,  $^3J_{H-H} = 8.3$ ,  $^3J_{Pt-H} = 24.3$ , H<sup>3'</sup>), 9.39 (s, H<sup>6'</sup>), 9.07 (d,  $^3J_{H-H} = 5.4$ ,  $^3J_{Pt-H} = 20.1$ , H<sup>1'</sup>), 8.58 (dd,  $^3J_{H-H} = 8.6$ ,  $^4J_{H-H} = 3.2$ , H<sup>2</sup>), 8.41 (d,  $^3J_{H-H} = 7.8$ , H<sup>8</sup>), 8.33 (d,  $^3J_{H-H} = 8.4$ , H<sup>4</sup>), 7.70 (t,  $^3J_{H-H} = 7.8$ , H<sup>9</sup>), 7.48 (t,  $^3J_{H-H} = 7.9$ , H<sup>5</sup>), 7.40 (t,  $^3J_{H-H} = 8.4$ , H<sup>10</sup>), 7.15 (t,  $^3J_{H-H} = 8.1$ , H<sup>6</sup>), 6.71 (d,  $^3J_{H-H} = 8.2$ ,  $^3J_{Pt-H} = 28.3$ , H<sup>11</sup>), 6.16 (d,  $^3J_{H-H} = 8.6$ , H<sup>7</sup>).  $^{13}C\{^1H\}$  NMR (100.6 MHz, CD<sub>3</sub>COCD<sub>3</sub>):  $\delta$  182.7 (s, C<sup>2</sup>, pbt), 153.2 (s,  $^3J_{Pt-C} = 17.3$ , C<sup>1'</sup>), 148.9 (s, C<sup>6'</sup>), 148.2 (s,  $^3J_{Pt-H} = 5.1$ , C<sup>12'</sup>), 146.1 (s,  $^3J_{Pt-H} = 36.9$ , C<sup>7a</sup>), 140.7 (s, C<sup>5'</sup>), 140.4 (s,  $^3J_{Pt-H} = 30.3$ , C<sup>3'</sup>), 138.0 (s, 17.9, C<sup>13</sup>), 136.5 (s,  $^4J_{Pt-H} = 33.8$ , C<sup>10</sup>), 133.1 (s, C<sup>4'</sup>), 132.4 (s, tentatively assigned to C<sup>12</sup>), 131.4 (s,  $^3J_{Pt-H} = 15.8$ , C<sup>3a</sup>), 130.9 (s, C<sup>11</sup>), 130.9 (s,  $^3J_{Pt-H} = 27.2$ , C<sup>2'</sup>), 130.6, 130.7 (s, C<sup>6,9</sup>), 129.2 (s,  $^3J_{Pt-H} = 48$ , C<sup>8</sup>), 128.7 (s, C<sup>5</sup>), 126.3 (s, C<sup>4</sup>), 117.8 (s, C<sup>7</sup>).  $^{19}F\{^1H\}$  NMR (376.5 MHz, CD<sub>3</sub>COCD<sub>3</sub>):  $\delta$  -72.6 (d,  $^1J_{F-P} = 709$ , PF<sub>6</sub>).  $^{31}P\{^1H\}$  NMR (161.9 MHz, CD<sub>3</sub>COCD<sub>3</sub>):  $\delta$  -145.3 (sept,  $^1J_{P-F} = 709$ , PF<sub>6</sub>).

**Synthesis of [Pt(pbt)<sub>2</sub>(NH<sub>2</sub>-phen)](PF<sub>6</sub>)<sub>2</sub> (6-PF<sub>6</sub>).** This complex was obtained as an orange solid (0.1570 g, 73 %) following the same procedure as **4-PF<sub>6</sub>**, starting of **2** (0.1327 g, 0.195 mmol), 5-amine-1,10-phenanthroline (0.0757 g, 0.388 mmol), TIPF<sub>6</sub> (0.2701 g, 0.773 mmol) and an excess KClO<sub>4</sub> (0.8105 g, 5.85 mmol). Elem. Anal. Calcd C<sub>38</sub>H<sub>25</sub>F<sub>12</sub>N<sub>5</sub>P<sub>2</sub>PtS<sub>2</sub> (1100.79): C, 41.46; H, 2.29; N, 6.36; S, 5.82. Found: C 41,42; H 2,51; N 6,21; S 5.71. MALDI (+): *m/z* (%) 955.958 [M-PF<sub>6</sub>]<sup>+</sup> (58), 810.049 [M-2PF<sub>6</sub>]<sup>+</sup>

(100), 615.053 [M-NH<sub>2</sub>-phen-2PF<sub>6</sub>]<sup>+</sup> (6), 600.123 [M-pbt-2PF<sub>6</sub>]<sup>+</sup> (20). IR (cm<sup>-1</sup>): ν(Pt-N) 469 (m), ν(PF<sub>6</sub>) 841, 557 (s). <sup>1</sup>H NMR (400 MHz, CD<sub>3</sub>COCD<sub>3</sub>): δ 9.38 (d, <sup>3</sup>J<sub>H-H</sub> = 8.6, H<sup>8''</sup>), 8.91 (d, <sup>3</sup>J<sub>H-H</sub> = 5.2, <sup>3</sup>J<sub>Pt-H</sub> = 15.1, H<sup>10''</sup>), 8.77 (d, <sup>3</sup>J<sub>H-H</sub> = 8.5, H<sup>3''</sup>), 8.44 (d, <sup>3</sup>J<sub>H-H</sub> = 5.2, <sup>3</sup>J<sub>Pt-H</sub> = 15.7, H<sup>1''</sup>), 8.35 (m, 5H, H<sup>9''</sup>, H<sup>8,8'</sup>, H<sup>4,4'</sup>), 8.06 (dd, <sup>3</sup>J<sub>H-H</sub> = 8.3, <sup>4</sup>J<sub>H-H</sub> = 3.3, H<sup>2''</sup>), 7.66 (2t, <sup>3</sup>J<sub>H-H</sub> = 7.6, H<sup>9,9'</sup>), 7.53 (t, <sup>3</sup>J<sub>H-H</sub> = 8.0, H<sup>5,5'</sup>), 7.35 (m, H<sup>6'',10,10''</sup>), 7.22, 7.19 (2t, <sup>3</sup>J<sub>H-H</sub> = 8.3, H<sup>6,6'</sup>), 6.76 (s, NH<sub>2</sub>), 6.73, 6.68 (2 d, <sup>3</sup>J<sub>H-H</sub> = 8.1, <sup>3</sup>J<sub>Pt-H</sub> = 27.8, H<sup>11,11'</sup>), 6.09 (d, <sup>3</sup>J<sub>H-H</sub> = 8.6, H<sup>7</sup>), 6.02 (d, <sup>3</sup>J<sub>H-H</sub> = 8.6, H<sup>7'</sup>). <sup>13</sup>C{<sup>1</sup>H} NMR (100.6 MHz, δ, CD<sub>3</sub>COCD<sub>3</sub>): δ 182.6 (s, C<sup>2,2'</sup>), 151.75 (s, <sup>3</sup>J<sub>Pt-C</sub> = 18.2, C<sup>1''</sup>), 147.6 (s, C<sup>5''</sup>), 147.1 (s, C<sup>11''</sup>), 146.5 (s, <sup>3</sup>J<sub>Pt-C</sub> = 17.6 C<sup>10''</sup>), 146.1 (2s, <sup>3</sup>J<sub>Pt-C</sub> = 39.4, C<sup>7a,a'</sup>), 140.5 (s, C<sup>8''</sup>), 140.2 (s, C<sup>12''</sup>), 138.9 (s, C<sup>3''</sup>), 138.0, 137.9 (C<sup>13,13'</sup>), 137.2, 136.8 (tentatively C<sup>12,12'</sup>), 136.4, 136.2 (<sup>3</sup>J<sub>Pt-C</sub> ~ 35 C<sup>10,10''</sup>), 135.8 (s, C<sup>7''</sup>), 132.3, 132.4 (C<sup>3a,a'</sup>), 130.9-130.3 (8s, C<sup>6,6',8,8',9,9',11,11'</sup>), 129.2 (s, <sup>3</sup>J<sub>Pt-C</sub> = 17.6 C<sup>2''</sup>), 128.7 (2 s, C<sup>5,5'</sup>), 128.4 (s, <sup>3</sup>J<sub>Pt-C</sub> = 17.6 C<sup>9''</sup>), 126.2 (3 s, C<sup>4'',4,4'</sup>), 117.4, 117.5 (d, C<sup>7,7'</sup>), 104.5 (s, C<sup>6''</sup>). <sup>19</sup>F{<sup>1</sup>H} NMR (376.5 MHz, CD<sub>3</sub>COCD<sub>3</sub>): δ -72.5 (d, <sup>1</sup>J<sub>F-P</sub> = 709, PF<sub>6</sub>). <sup>31</sup>P{<sup>1</sup>H} NMR (161.9 MHz, CD<sub>3</sub>COCD<sub>3</sub>): δ -144.3 (sept, <sup>1</sup>J<sub>P-F</sub> = 709, PF<sub>6</sub>).

**X-ray structure determinations.** Yellow (**2**), white (**3**) and yellow (**4-PF<sub>6</sub>**) crystals were obtained by slow diffusion of *i*PrOH into a solution of **2** in CHCl<sub>3</sub>, of Et<sub>2</sub>O into a solution of **3** in CH<sub>2</sub>Cl<sub>2</sub> and of *n*-hexane into a solution of (**4-PF<sub>6</sub>**) in acetone at room temperature. X-ray intensity data were collected using Molybdenum graphite monochromatic (Mo-K<sub>α</sub>) radiation with a Bruker APEX-II diffractometer at 173 K for **2** and at 298 K for **3** and **4-PF<sub>6</sub>** using the APEX-II software. Structures were solved by Intrinsic Phasing using SHELXT<sup>3</sup> with the WinGX graphical user interface.<sup>4</sup> Multi-scan absorption corrections were applied to all the data sets and refined by full-matrix least squares on *F*<sup>2</sup> with SHELXL.<sup>5</sup> Hydrogen atoms were positioned geometrically, with isotropic parameters *U*<sub>iso</sub> = 1.2 *U*<sub>eq</sub> (parent atom) for aromatic hydrogens. These complexes crystallized in a centrosymmetric group, so must be aquiral. Thus, both configurations (Λ and Δ) in a 50:50 ratio were found in the unit cell.

**Theoretical Calculations.** Calculations were carried out with the Gaussian 16 package<sup>6</sup> for **2**, **3**, **4<sup>2+</sup>**-**6<sup>2+</sup>** using Becke's three-parameter functional combined with Lee-Yang-Parr's correlation functional (B3LYP).<sup>7</sup> Optimizations on the singlet state (S<sub>0</sub>) were performed using as a starting point the molecular geometry obtained through X-ray diffraction analysis for complex **2** and **3** and simulated structures

for  $4^{2+}$ - $6^{2+}$ . No negative frequency was found in the vibrational frequency analysis of the final equilibrium geometries. The basis set used was the LanL2DZ effective core potential for Pt and 6-31G(d,p) for the ligand atoms.<sup>8</sup> DFT and TD-DFT calculations were carried out using the polarized continuum model approach<sup>9</sup> (PCM) implemented in the Gaussian 16 software, in the presence of  $\text{CH}_2\text{Cl}_2$ . The results were visualized with GaussView 6. Overlap populations between molecular fragments were calculated using the GaussSum 3.0 software.<sup>10</sup>

## References

- (1) Obeid, N.; Skulski, L. One-Pot Procedures for Preparing (Dichloroiodo)arenes from Arenes and Diiodine, with Chromium(VI) Oxide as the Oxidant. *Molecules* **2001**, *6*, 869-874.
- (2) Zhou, Y.; Jia, J.; Cai, L.; Huang, Y. Protein staining agents from low toxic platinum(II) complexes with bidentate ligands. *Dalton Trans.* **2018**, *47*, 693-699.
- (3) Sheldrick, G. M. SHELXT – Integrated space-group and crystal structure determination. *Acta Crystallogr., Sect. A: Found. Crystallogr.* **2015**, *71*, 3-8.
- (4) Farrugia, L. J. WinGX suite for small-molecule single-crystal crystallography. *Appl. Crystallogr.* **1999**, *32*, 837-838.
- (5) Sheldrick, G. Crystal structure refinement with SHELXL. *Acta Crystallogr., Sect. C* **2015**, *71*, 3-8.
- (6) M. J. Frisch, G. W. Trucks, H. B. Schlegel, G. E. Scuseria, M. A. Robb, J. R. Cheeseman, G. Scalmani, V. Barone, G. A. Petersson, H. Nakatsuji, X. Li, M. Caricato, A. V. Marenich, J. Bloino, B. G. Janesko, R. Gomperts, B. Mennucci, H. P. Hratchian, J. V. Ortiz, A. F. Izmaylov, J. L. Sonnenberg, D. Williams-Young, F. Ding, F. Lipparini, F. Egidi, J. Goings, B. Peng, A. Petrone, T. Henderson, D. Ranasinghe, V. G. Zakrzewski, J. Gao, N. Rega, G. Zheng, W. Liang, M. Hada, M. Ehara, K. Toyota, R. Fukuda, J. Hasegawa, M. Ishida, T. Nakajima, Y. Honda, O. Kitao, H. Nakai, T. Vreven, K. Throssell, J. A. Montgomery, Jr., J. E. Peralta, F. Ogliaro, M. J. Bearpark, J. J. Heyd, E. N. Brothers, K. N. Kudin, V. N. Staroverov, T. A. Keith, R. Kobayashi, J. Normand, K. Raghavachari, A. P. Rendell, J. C. Burant, S. S. Iyengar, J. Tomasi, M. Cossi, J. M. Millam, M. Klene, C. Adamo, R. Cammi, J. W. Ochterski, R. L. Martin, K. Morokuma, O. Farkas, J. B. Foresman, and D. J. Fox, Gaussian 16, Revision A.03, Inc., Wallingford CT, 2016.
- (7) (a) Becke, A. D. Density-functional thermochemistry. III. The role of exact exchange. *J. Chem. Phys.* **1993**, *98*, 5648-5652. (b) Becke, A. D. Density-functional exchange-energy approximation with correct asymptotic behavior. *Phys. Rev. A* **1988**, *38*, 3098-3100.
- (8) Wadt, W. R.; Hay, P. J. Ab initio effective core potentials for molecular calculations. Potentials for main group elements Na to Bi. *J. Chem. Phys.* **1985**, *82*, 284-298.
- (9) Barone, V.; Cossi, M. Quantum Calculation of Molecular Energies and Energy Gradients in Solution by a Conductor Solvent Model. *J. Phys. Chem. A* **1998**, *102*, 1995-2001.
- (10) O'Boyle, N. M.; Tenderholt, A. L.; Langner, K. M. cclib: A library for package-independent computational chemistry algorithms. *J. Comput. Chem.* **2008**, *29*, 839-845.



## 2. NMR spectra

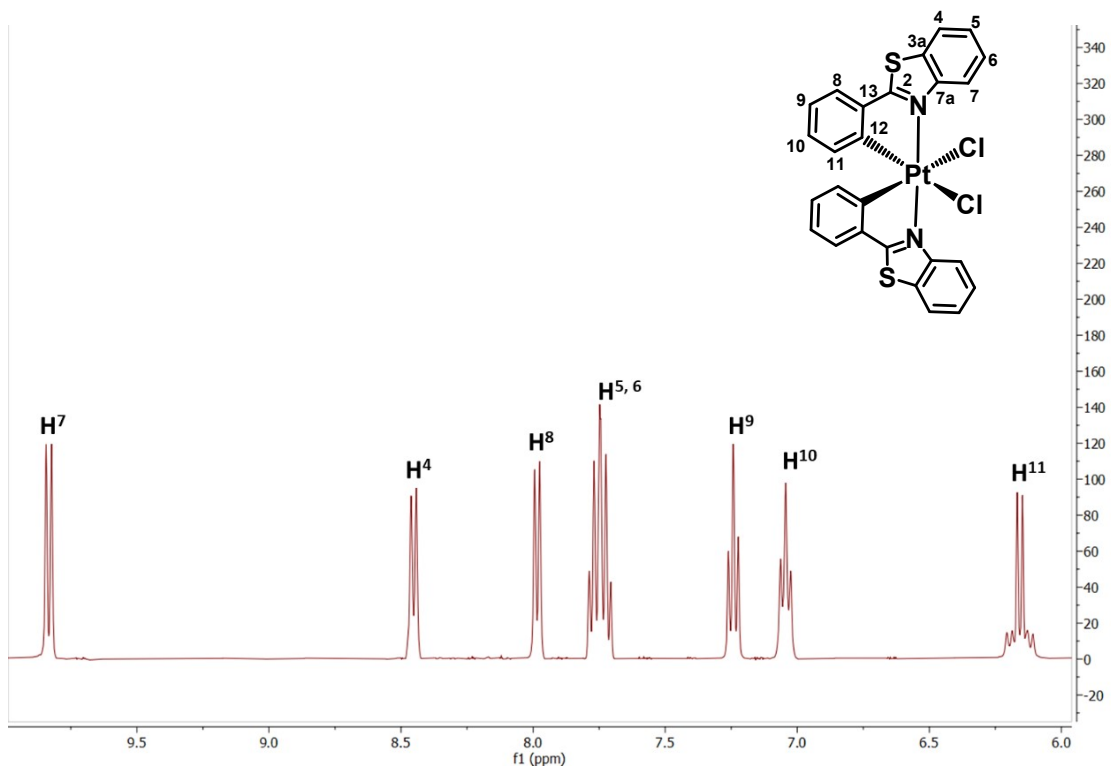

Figure S1.  $^1\text{H}$  NMR spectra of **2** in  $\text{DMSO-d}_6$  at 298 K

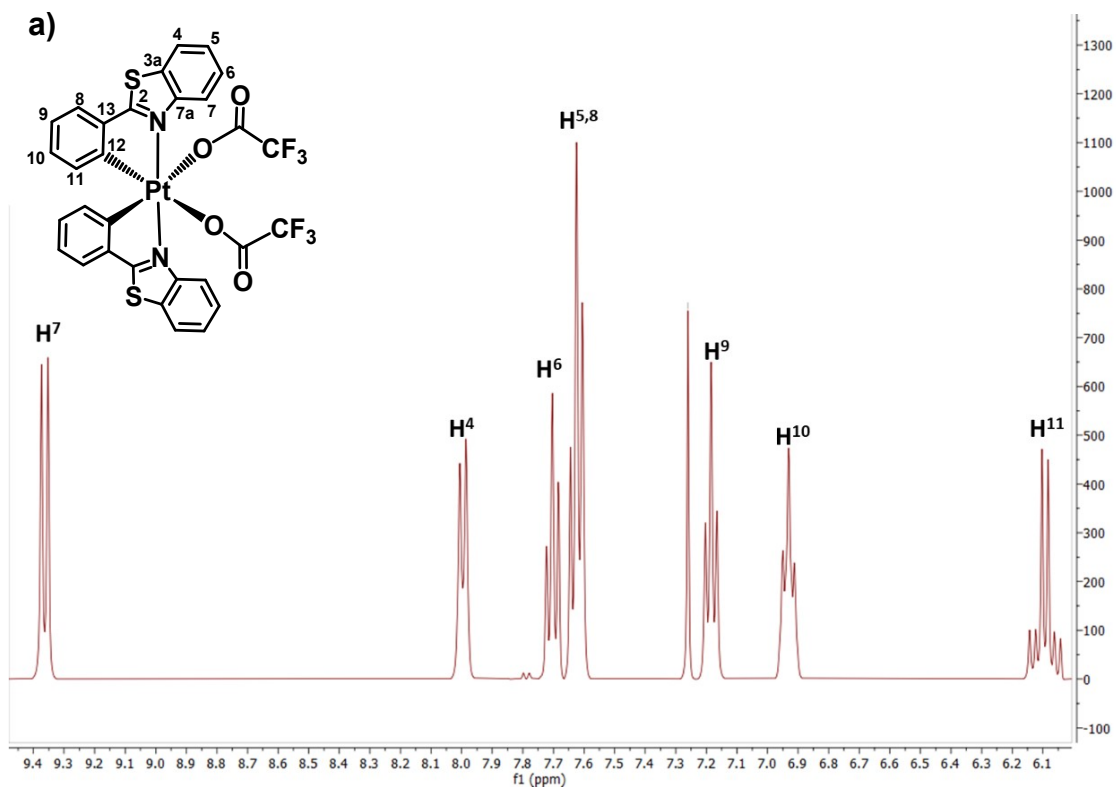

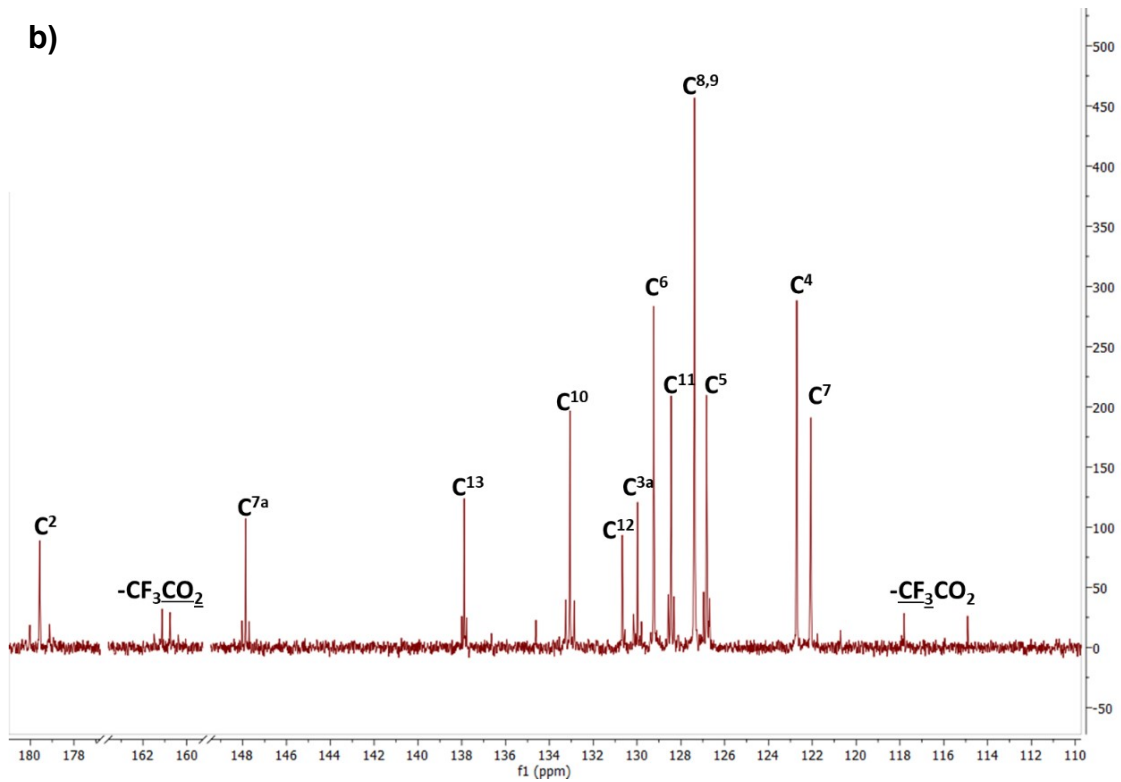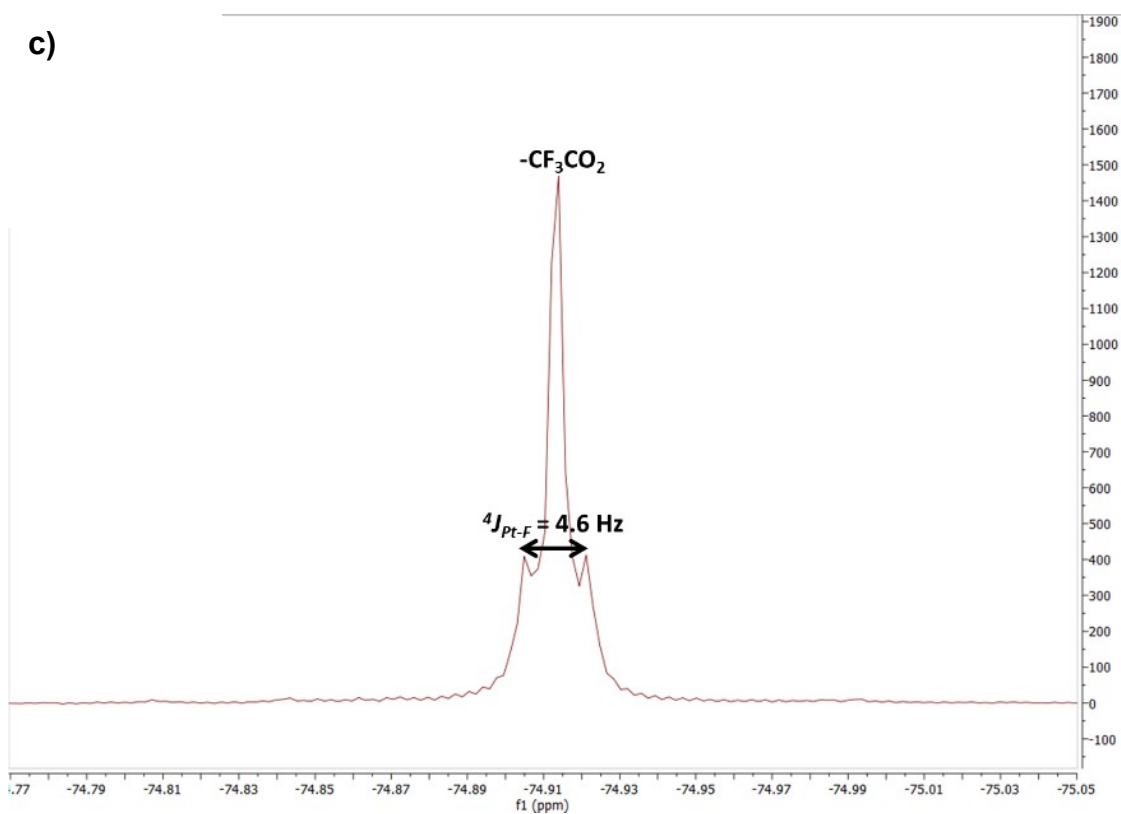

**Figure S2.** NMR spectra of **3** in  $\text{CDCl}_3$  at 298 K a)  $^1\text{H}$ , b)  $^{13}\text{C}\{^1\text{H}\}$ , c)  $^{19}\text{F}\{^1\text{H}\}$



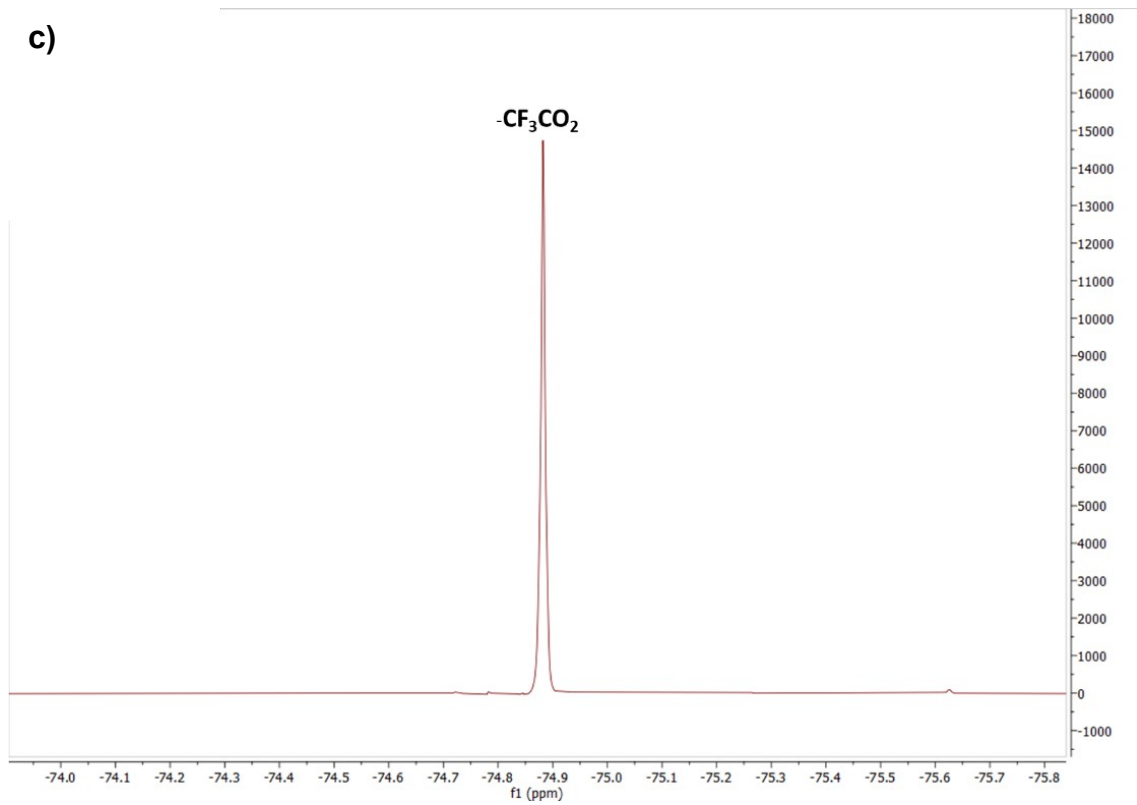

**Figure S3.** NMR spectra of 4-CF<sub>3</sub>CO<sub>2</sub> in CDCl<sub>3</sub> at 298 K a)  $^1\text{H}$ , b)  $^{13}\text{C}\{^1\text{H}\}$ , c)  $^{19}\text{F}\{^1\text{H}\}$

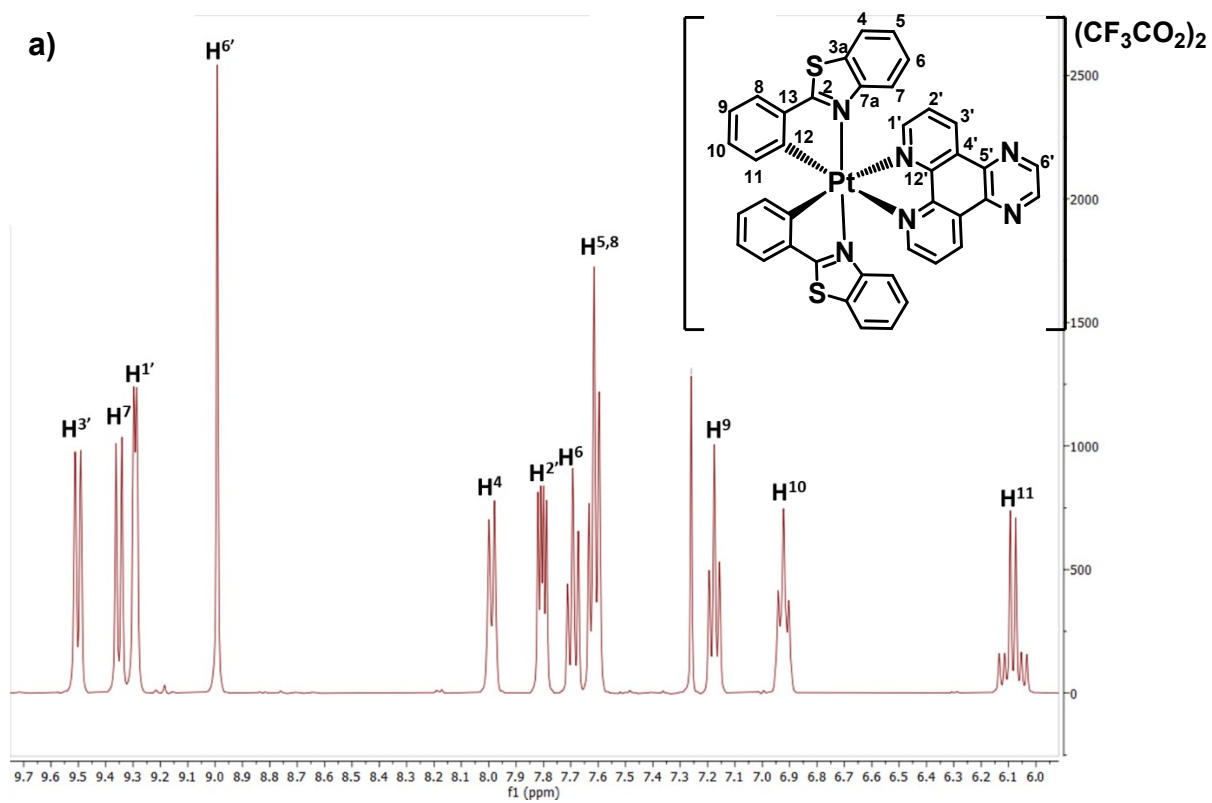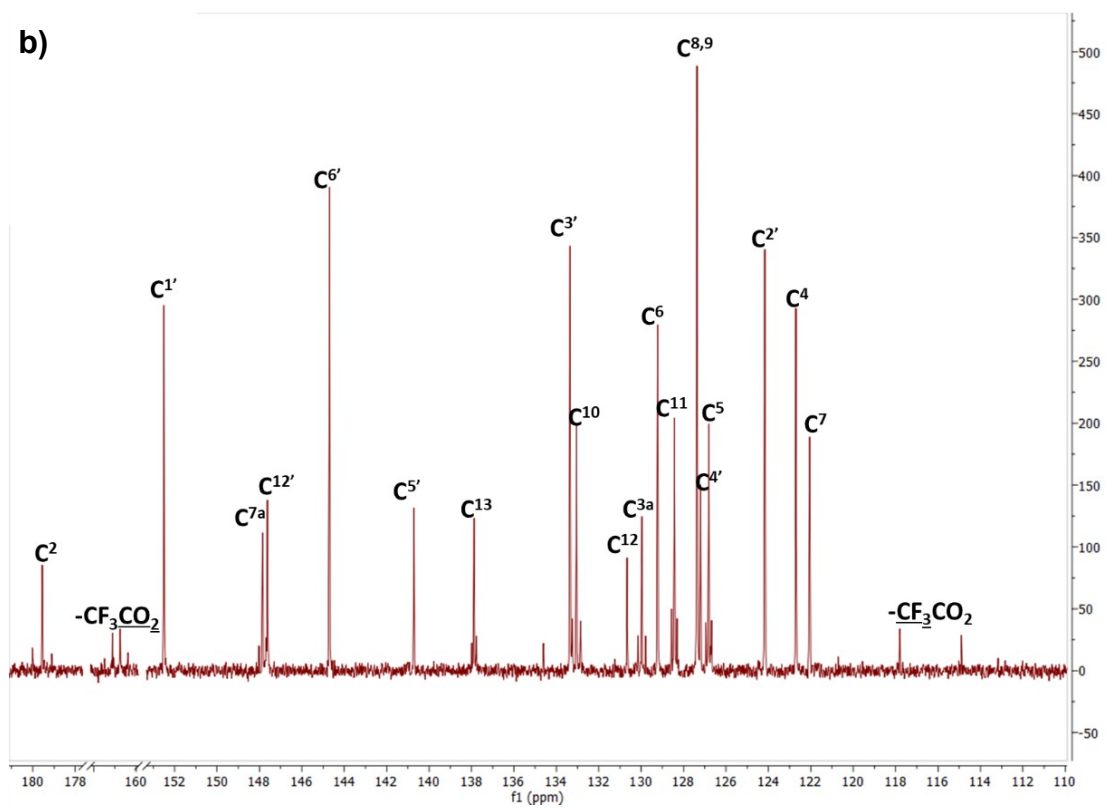

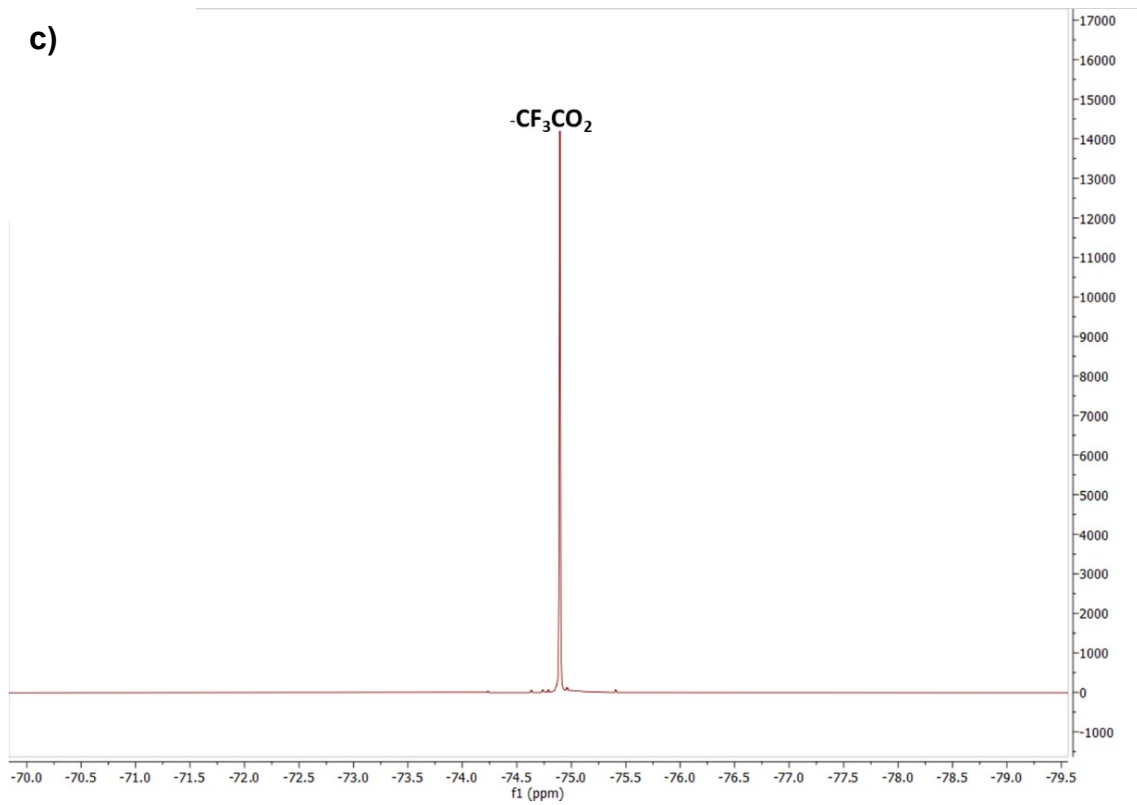

**Figure S4.** NMR spectra of 5-CF<sub>3</sub>CO<sub>2</sub> in CDCl<sub>3</sub> at 298 K a)  $^1\text{H}$ , b)  $^{13}\text{C}\{^1\text{H}\}$ , c)  $^{19}\text{F}\{^1\text{H}\}$

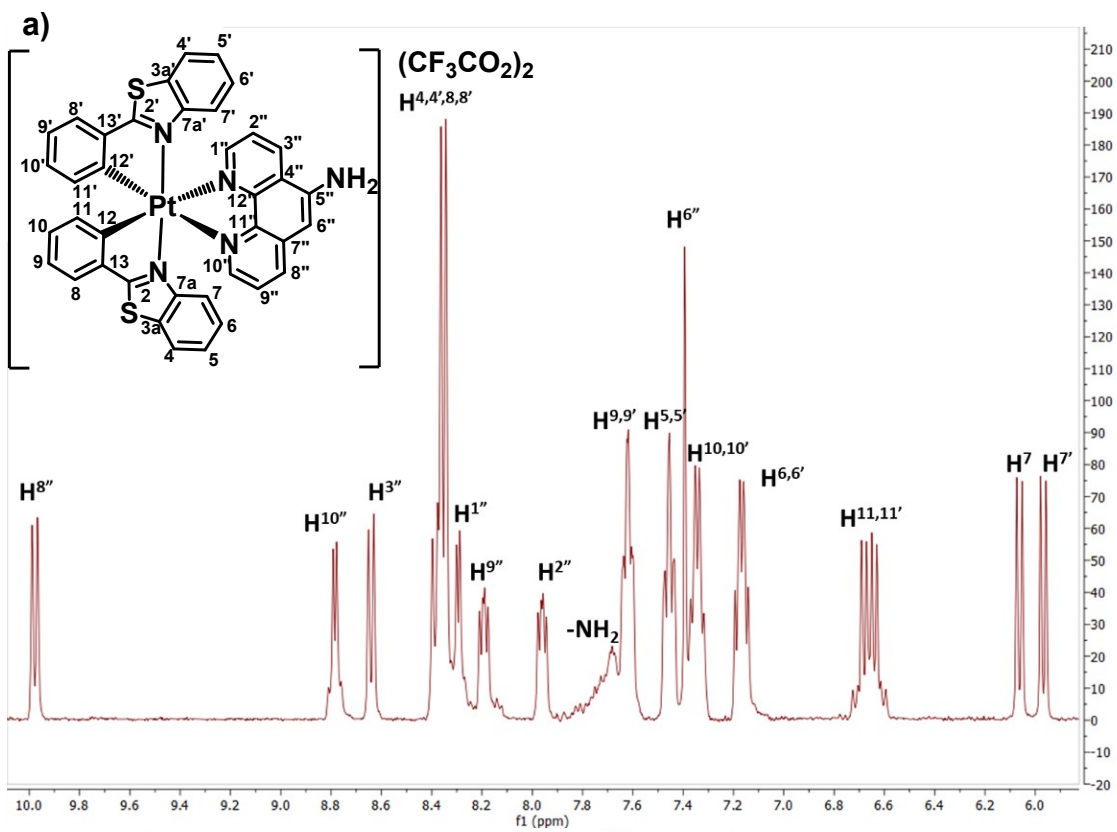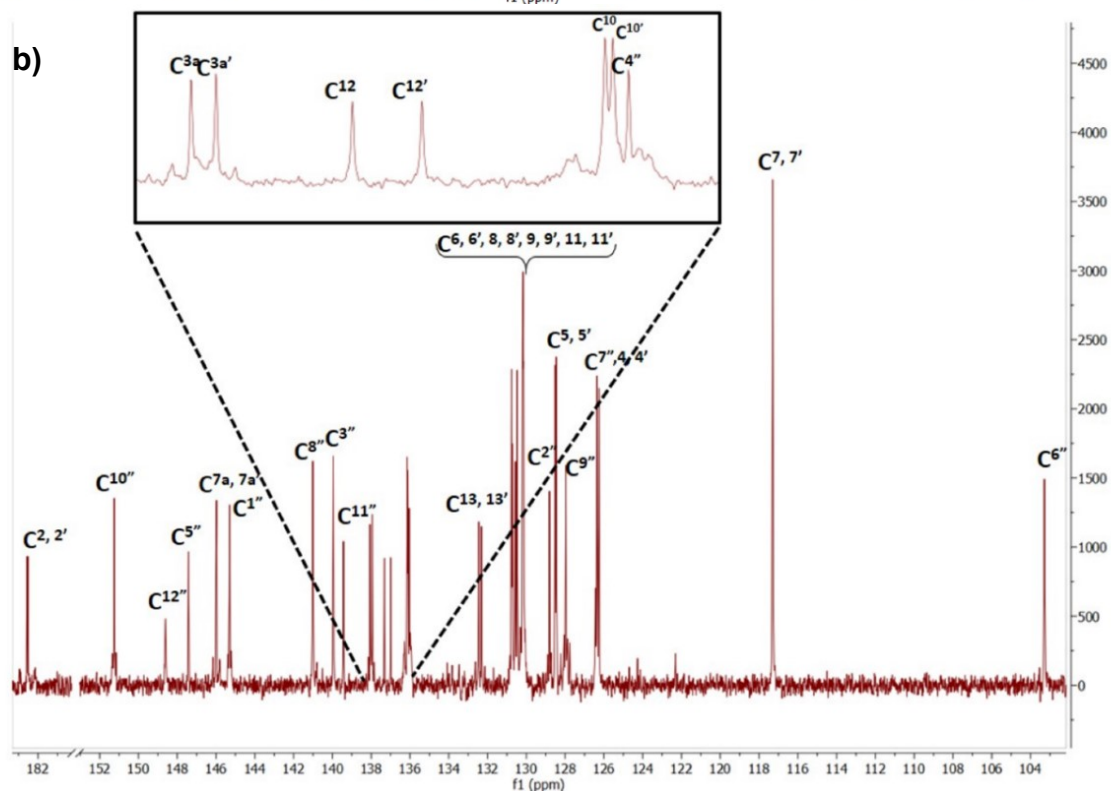

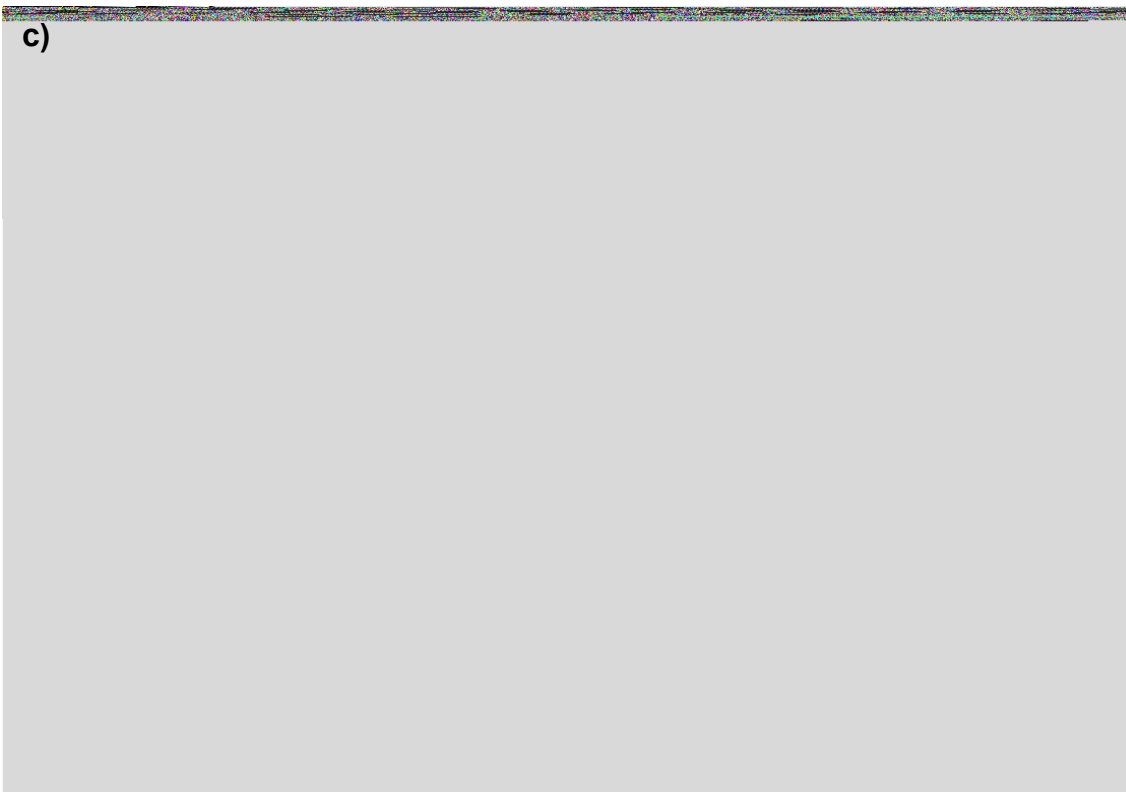

**Figure S5.** NMR spectra of **6-CF<sub>3</sub>CO<sub>2</sub>** in CD<sub>3</sub>COCD<sub>3</sub> at 298 K a) <sup>1</sup>H, b) <sup>13</sup>C {<sup>1</sup>H}, c) <sup>19</sup>F {<sup>1</sup>H}



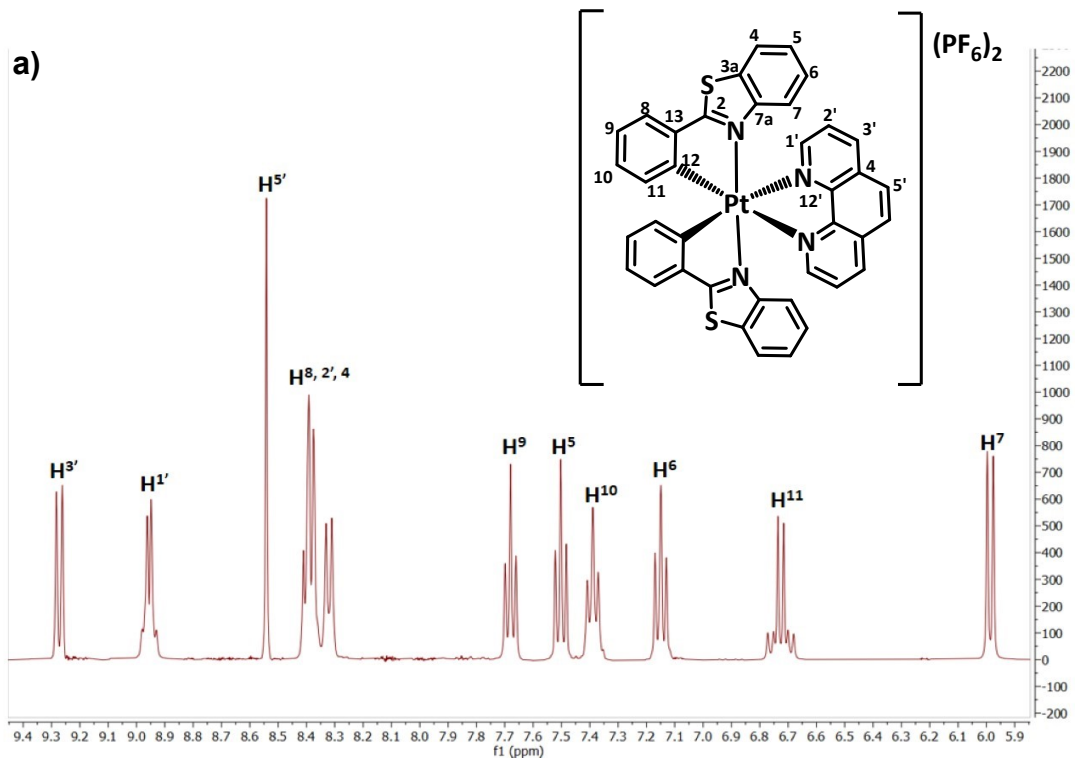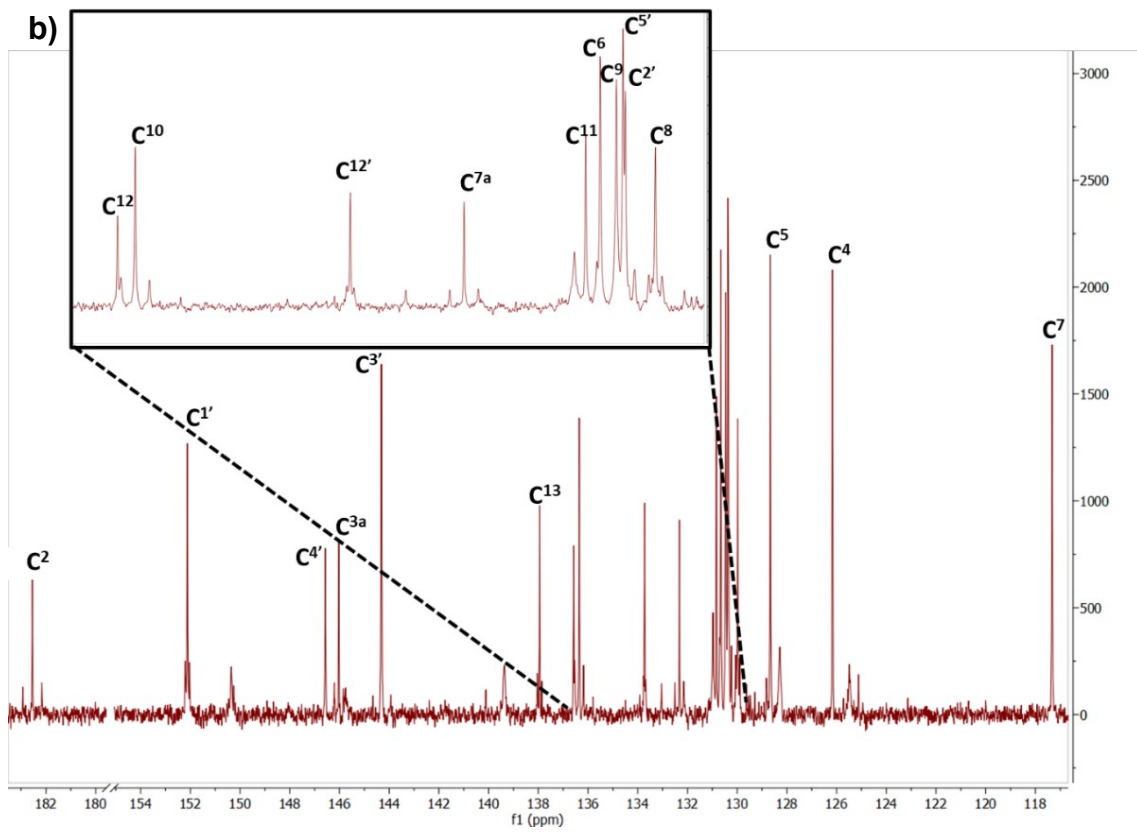

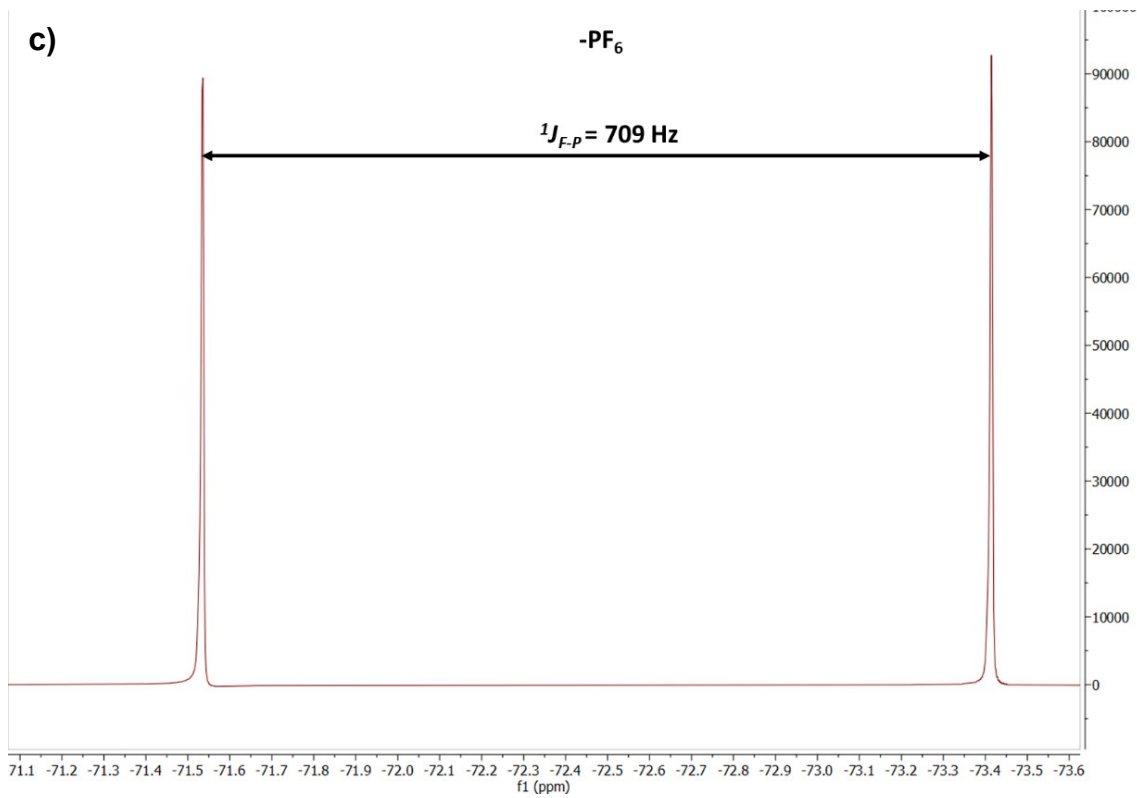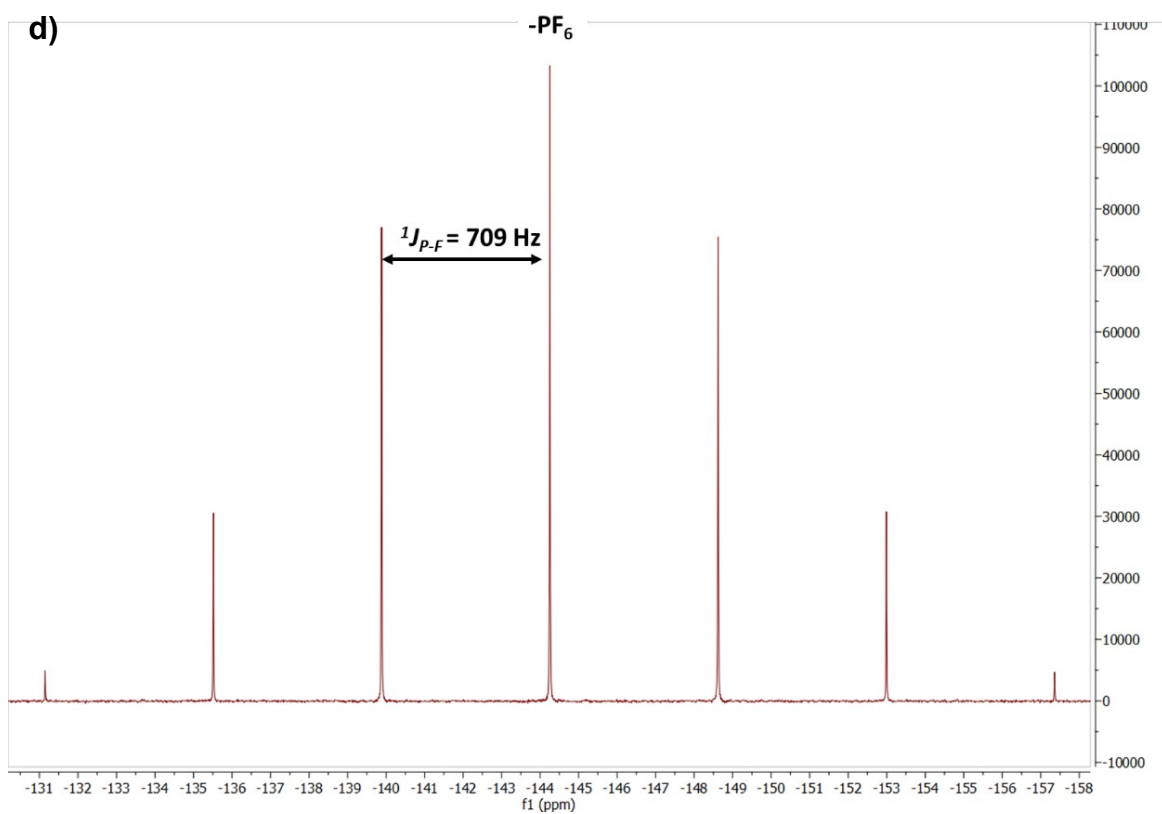

**Figure S6.** NMR spectra of  $4\text{-PF}_6$  in  $\text{CD}_3\text{COCD}_3$  at 298 K a)  $^1\text{H}$ , b)  $^{13}\text{C}\{^1\text{H}\}$ , c)  $^{19}\text{F}\{^1\text{H}\}$ , d)  $^{31}\text{P}\{^1\text{H}\}$

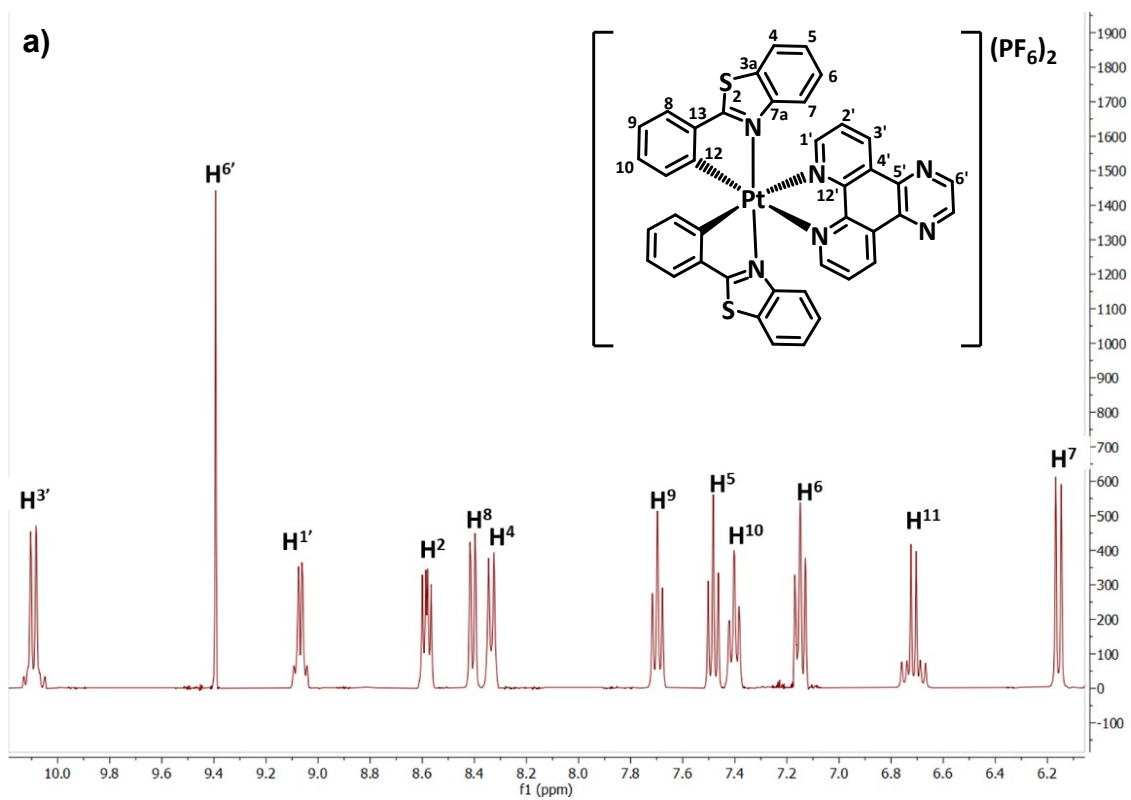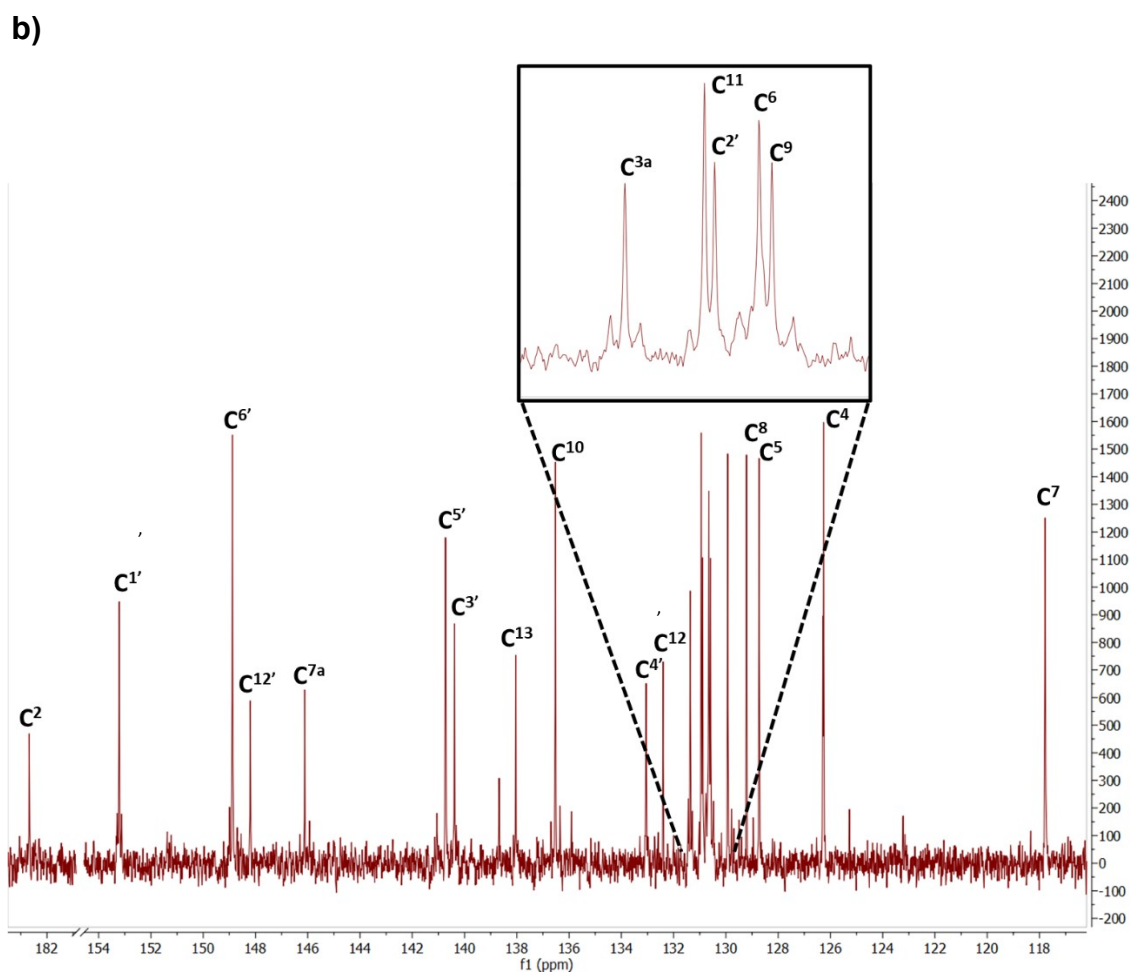

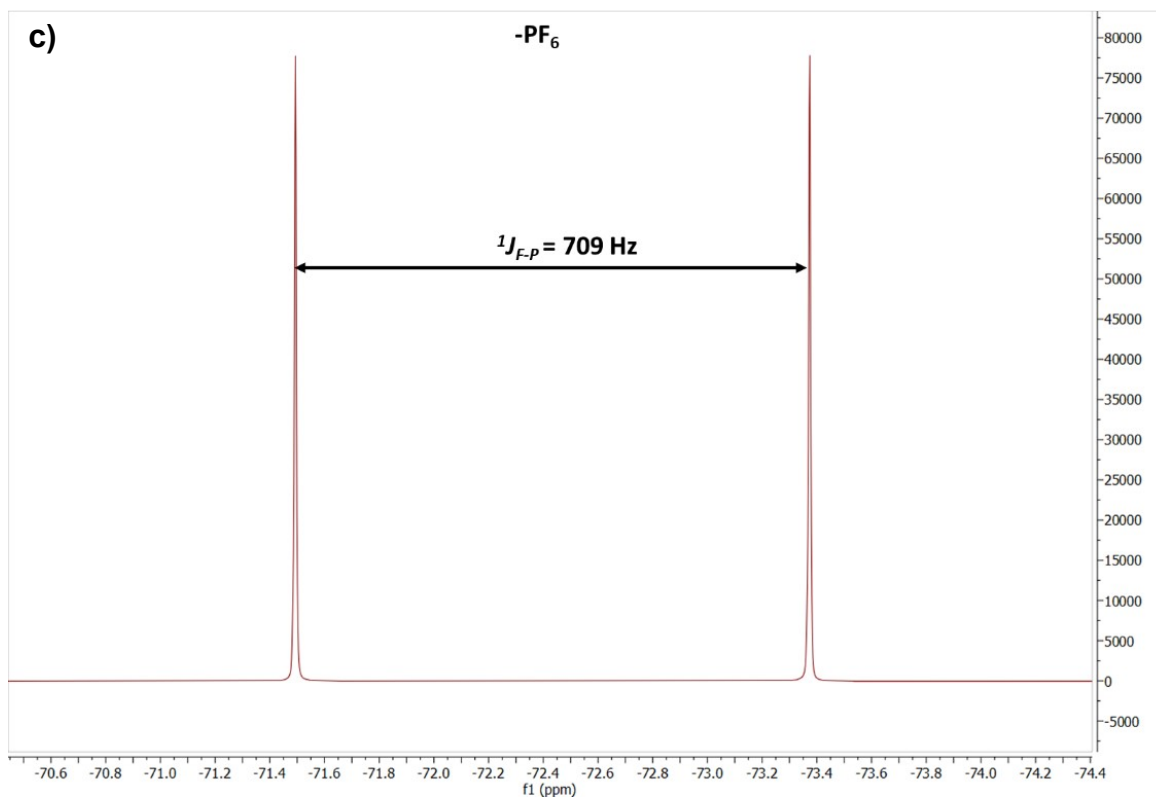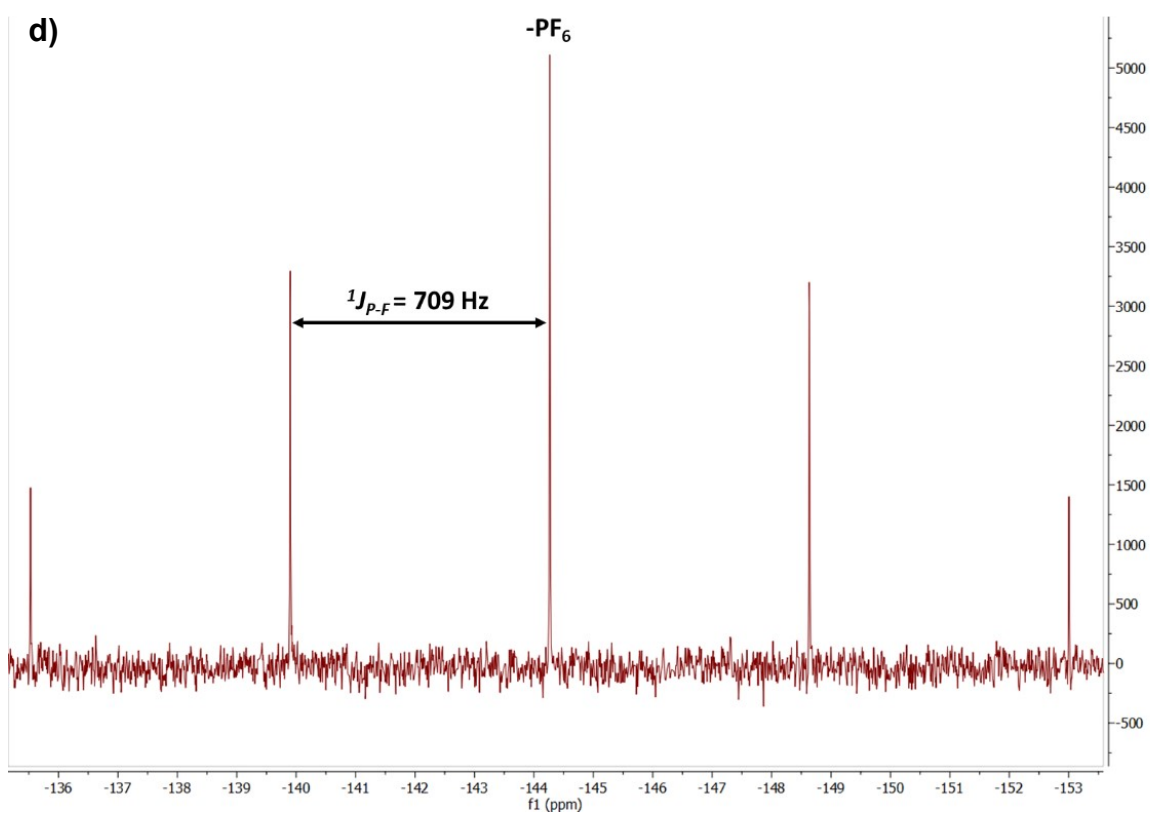

**Figure S7.** NMR spectra of **5-PF<sub>6</sub>** in CD<sub>3</sub>COCD<sub>3</sub> at 298 K a) <sup>1</sup>H, b) <sup>13</sup>C{<sup>1</sup>H}, c) <sup>19</sup>F{<sup>1</sup>H}, d) <sup>31</sup>P{<sup>1</sup>H}

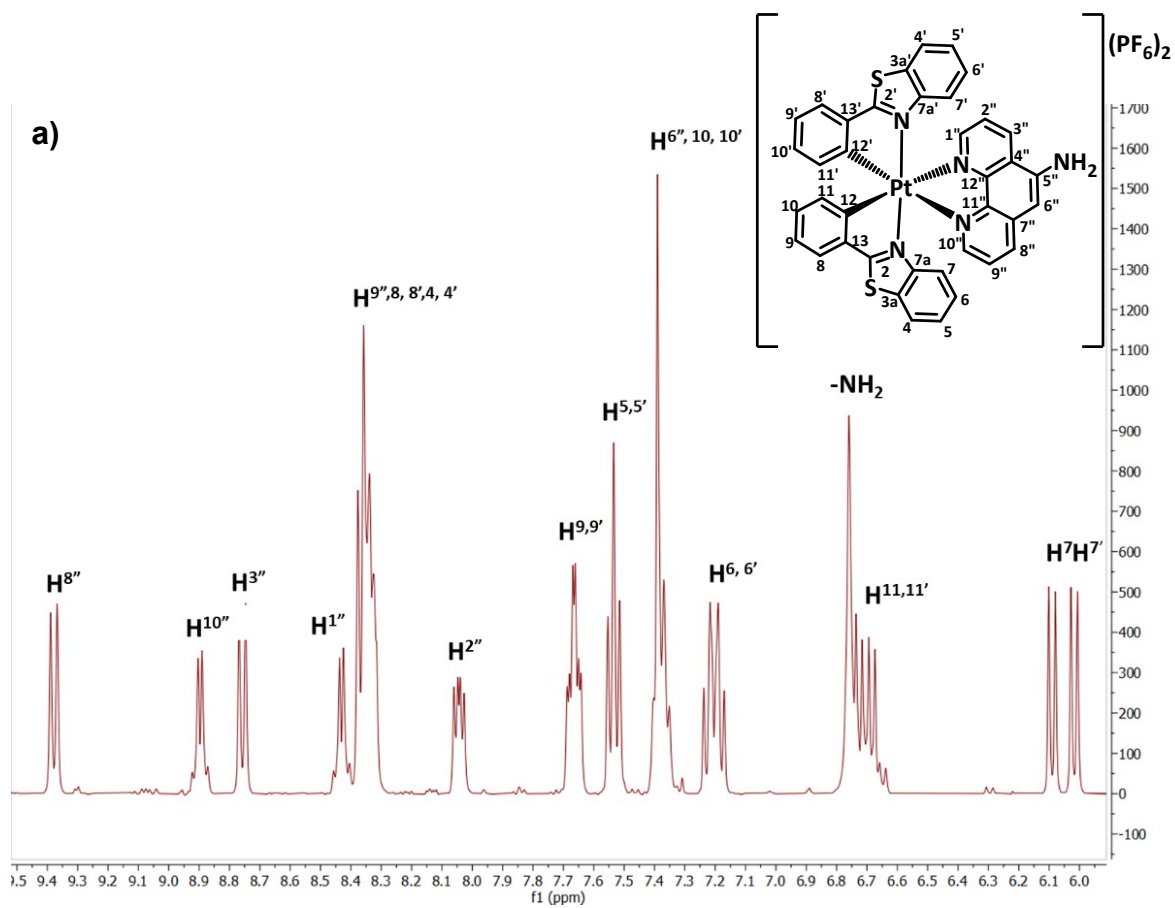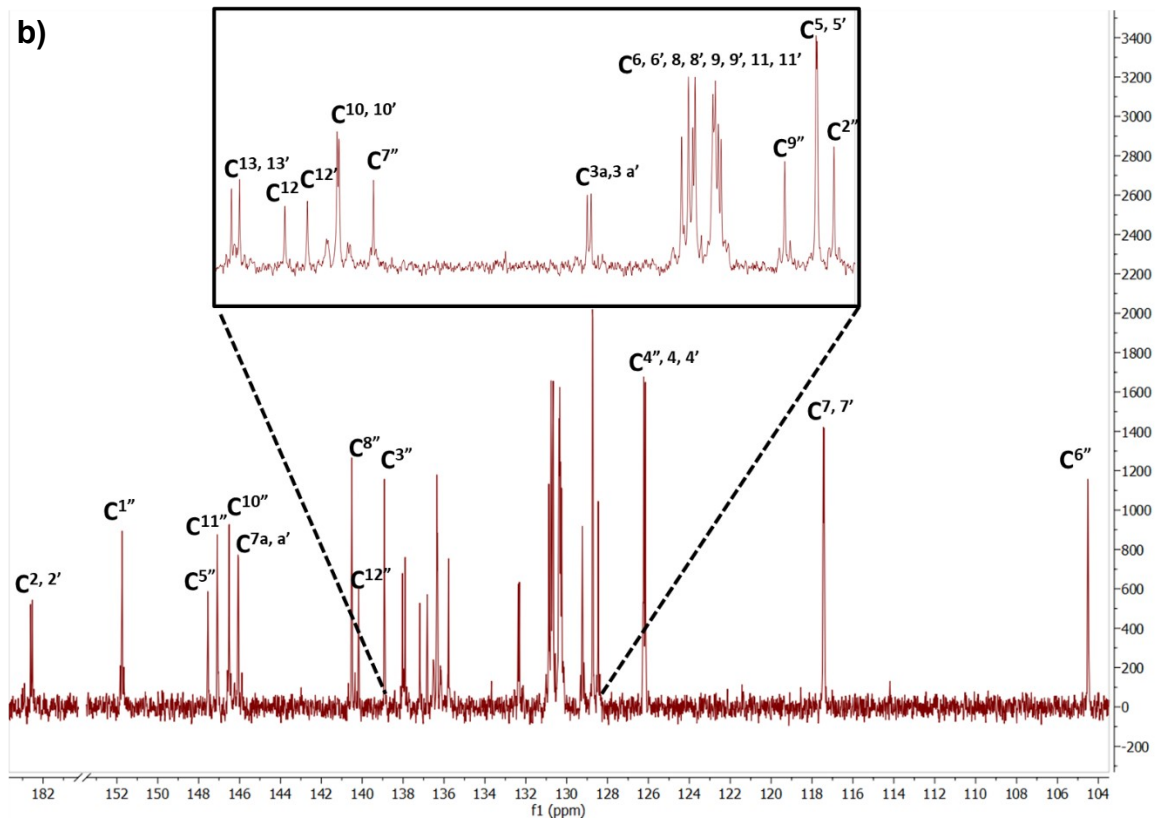

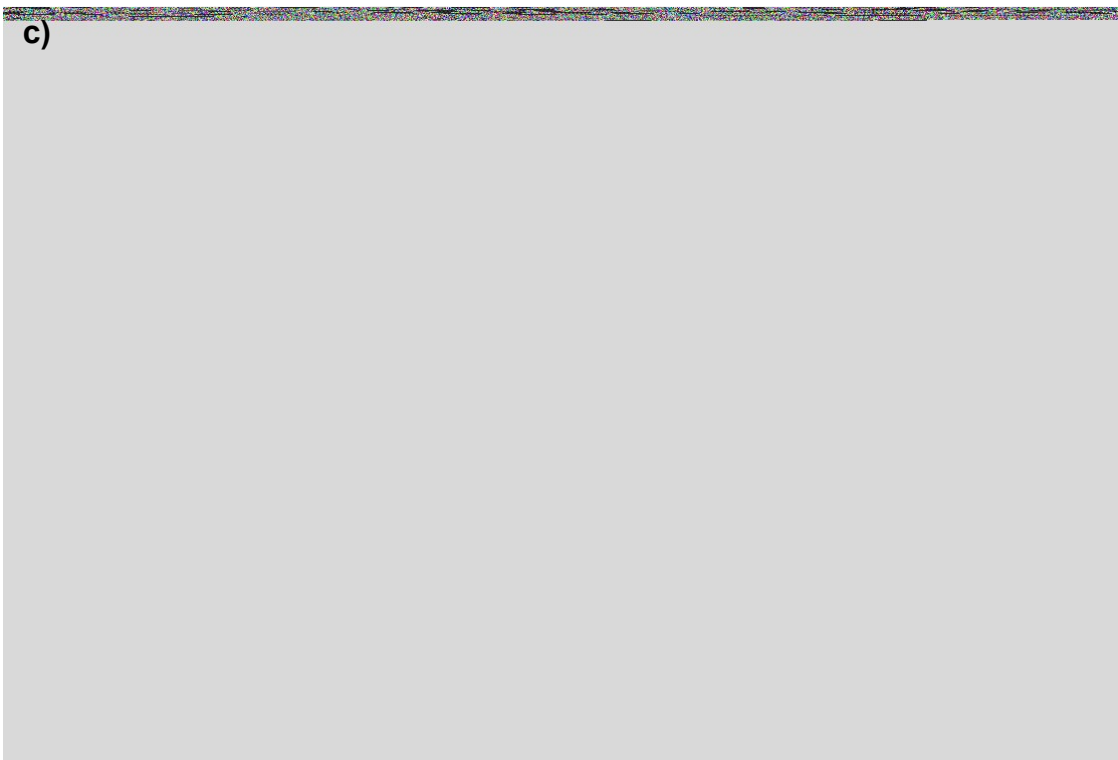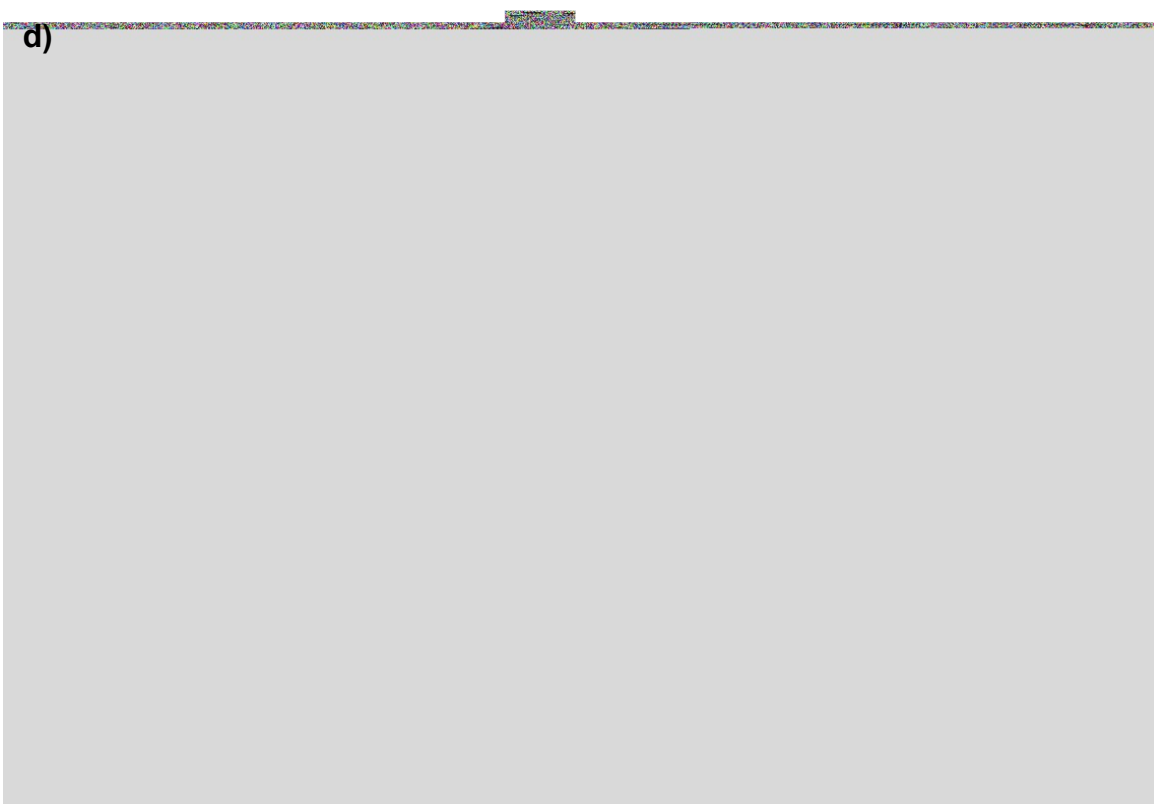

**Figure S8.** NMR spectra of **6-PF<sub>6</sub>** in  $\text{CD}_3\text{COCD}_3$  at 298 K a)  $^1\text{H}$ , b)  $^{13}\text{C}\{^1\text{H}\}$ , c)  $^{19}\text{F}\{^1\text{H}\}$ , d)  $^{31}\text{P}\{^1\text{H}\}$

### 3. X-Ray Diffraction Studies

Table S1. X-ray Crystallographic Data for **2**, **3** and **4-PF<sub>6</sub>**

|                                                                   | <b>2</b>                                                                        | <b>3</b>                                                                                      | <b>4-PF<sub>6</sub></b>                                                                        |
|-------------------------------------------------------------------|---------------------------------------------------------------------------------|-----------------------------------------------------------------------------------------------|------------------------------------------------------------------------------------------------|
| <b>Empirical formula</b>                                          | C <sub>26</sub> H <sub>16</sub> Cl <sub>2</sub> N <sub>2</sub> PtS <sub>2</sub> | C <sub>30</sub> H <sub>16</sub> F <sub>6</sub> N <sub>2</sub> O <sub>4</sub> PtS <sub>2</sub> | C <sub>38</sub> H <sub>24</sub> F <sub>12</sub> N <sub>4</sub> P <sub>2</sub> PtS <sub>2</sub> |
| <b>Molecular weight</b>                                           | 686.52                                                                          | 841.66                                                                                        | 1085.76                                                                                        |
| <b>T (K)</b>                                                      | 100(2) K                                                                        | 300(2) K                                                                                      | 100(2) K                                                                                       |
| <b>Wavelength (Å)</b>                                             | 0.71076                                                                         | 0.71076                                                                                       | 0.71073                                                                                        |
| <b>Crystal system</b>                                             | Orthorhombic                                                                    | Monoclinic                                                                                    | Orthorhombic                                                                                   |
| <b>Space group</b>                                                | P b c a                                                                         | P 2 <sub>1</sub> /c                                                                           | P b c n                                                                                        |
| <b>Crystal size (mm)</b>                                          | 0.119 x 0.070 x 0.053                                                           | 0.290 x 0.273 x 0.064                                                                         | 0.450 x 0.115 x 0.075                                                                          |
| <b>a (Å)</b>                                                      | 12.5836(6)                                                                      | 19.070(4)                                                                                     | 14.0515(15)                                                                                    |
| <b>b (Å)</b>                                                      | 14.5133(7)                                                                      | 17.181(4)                                                                                     | 15.0725(15)                                                                                    |
| <b>c (Å)</b>                                                      | 24.9740(11)                                                                     | 9.1111(19)                                                                                    | 17.2359(19)                                                                                    |
| <b>α (°)</b>                                                      | 90                                                                              | 90                                                                                            | 90                                                                                             |
| <b>β (°)</b>                                                      | 90                                                                              | 91.00                                                                                         | 90                                                                                             |
| <b>γ (°)</b>                                                      | 90                                                                              | 90                                                                                            | 90                                                                                             |
| <b>V (Å<sup>3</sup>)</b>                                          | 4561.0(4)                                                                       | 2984.8(11)                                                                                    | 3650.4(7)                                                                                      |
| <b>Z</b>                                                          | 8                                                                               | 4                                                                                             | 4                                                                                              |
| <b>Density (calculated) (Mg/cm<sup>3</sup>)</b>                   | 2.000                                                                           | 1.873                                                                                         | 1.976                                                                                          |
| <b>Absorption coefficient (mm<sup>-1</sup>)</b>                   | 6.589                                                                           | 4.918                                                                                         | 4.146                                                                                          |
| <b>F(000)</b>                                                     | 2640                                                                            | 1624                                                                                          | 2112                                                                                           |
| <b>θ range for data collection (°)</b>                            | 2.693 to 26.373                                                                 | 3.192 to 28.043                                                                               | 3.085 to 25.677                                                                                |
| <b>Index ranges</b>                                               | -15<=h<=15,<br>-18<=k<=18,<br>-31<=l<=31                                        | -25<=h<=25,<br>-22<=k<=22,<br>-11<=l<=11                                                      | 17<=h<=17,<br>-18<=k<=18,<br>-20<=l<=20                                                        |
| <b>Reflections collected</b>                                      | 257759                                                                          | 139304                                                                                        | 119953                                                                                         |
| <b>Independent reflections</b>                                    | 4655 [R(int) = 0.0311]                                                          | 7077 [R(int) = 0.0393]                                                                        | 2715 [R(int) = 0.0278]                                                                         |
| <b>Data / restraints / parameters</b>                             | 4655 / 0 / 298                                                                  | 7077 / 0 / 406                                                                                | 2715 / 0 / 267                                                                                 |
| <b>Goodness-of-fit on F<sup>2</sup></b>                           | 1.099                                                                           | 1.113                                                                                         | 1.249                                                                                          |
| <b>Final R indices [I&gt;2σ(I)]<sup>[a]</sup></b>                 | R1 = 0.0150, wR2 = 0.0347                                                       | R1 = 0.0246, wR2 = 0.0540                                                                     | R1 = 0.0278, wR2 = 0.0602                                                                      |
| <b>R indices (all data)<sup>[a]</sup></b>                         | R1 = 0.0156, wR2 = 0.0351                                                       | R1 = 0.0314, wR2 = 0.0585                                                                     | R1 = 0.0295, wR2 = 0.0605                                                                      |
| <b>Largest diff. peak and hole (e Å<sup>-3</sup>) (dmin/dmax)</b> | 2.048 and -0.899                                                                | 0.725 and -0.804                                                                              | 1.342 and -0.667                                                                               |

<sup>[a]</sup> R1 =  $\sum(|F_o| - |F_c|) / \sum |F_o|$ ; wR2 =  $[\sum w(F_o^2 - F_c^2)^2 / \sum w F_o^2]^{1/2}$ ; goodness of fit =  $\{\sum [w(F_o^2 - F_c^2)^2] / (N_{\text{obs}} - N_{\text{param}})\}^{1/2}$ ; w =  $[\sigma^2(F_o) + (g_1 P)^2 + g_2 P]^{-1}$ ; P =  $[\max(F_o^2; 0 + 2F_c^2)]/3$ .

**Table S2.** Selected distances (Å) and angles (°) for complexes **2**, **3** and **4-PF<sub>6</sub>**

| <b>2</b>                |            |                   |            |
|-------------------------|------------|-------------------|------------|
| <b>Distances (Å)</b>    |            | <b>Angles (°)</b> |            |
| Pt(1)-C(1)              | 2.025 (2)  | C(1)-Pt(1)-N(2)   | 91.11 (8)  |
| Pt(1)-N(1)              | 2.0491 (2) | C(1)-Pt(1)-N(1)   | 81.14 (9)  |
| Pt(1)-C(14)             | 2.022 (2)  | C(1)-Pt(1)-C(14)  | 90.80 (9)  |
| Pt(1)-N(2)              | 2.0386 (2) | C(14)-Pt(1)-N(2)  | 81.00 (9)  |
| Pt(1)-Cl(1)             | 2.4439 (6) | C(14)-Pt(1)-N(1)  | 93.76 (9)  |
| Pt(1)-Cl(2)             | 2.4418 (6) | C(1)-Pt(1)-Cl(2)  | 90.91 (7)  |
|                         |            | N(2)-Pt(1)-Cl(2)  | 102.52 (6) |
|                         |            | N(1)-Pt(1)-Cl(2)  | 82.99 (6)  |
|                         |            | C(14)-Pt(1)-Cl(1) | 87.94 (6)  |
|                         |            | N(2)-Pt(1)-Cl(1)  | 85.53 (6)  |
|                         |            | N(1)-Pt(1)-Cl(1)  | 102.14 (6) |
|                         |            | Cl(2)-Pt(1)-Cl(1) | 90.55 (2)  |
| <b>3</b>                |            |                   |            |
| <b>Distances (Å)</b>    |            | <b>Angles (°)</b> |            |
| Pt(1)-C(1)              | 2.013 (3)  | C(1)-Pt(1)-N(2)   | 92.05 (12) |
| Pt(1)-N(1)              | 2.031 (2)  | C(1)-Pt(1)-N(1)   | 81.83 (12) |
| Pt(1)-C(14)             | 2.031 (4)  | C(1)-Pt(1)-C(14)  | 87.11 (13) |
| Pt(1)-N(2)              | 2.029 (3)  | N(2)-Pt(1)-C(14)  | 80.57 (15) |
| Pt(1)-O(1)              | 2.133 (2)  | N(1)-Pt(1)-C(14)  | 95.25 (13) |
| Pt(1)-O(3)              | 2.158 (3)  | N(2)-Pt(1)-O(1)   | 92.04 (9)  |
|                         |            | N(1)-Pt(1)-O(1)   | 94.04(10)  |
|                         |            | C(14)-Pt(1)-O(1)  | 92.92(12)  |
|                         |            | C(1)-Pt(1)-O(3)   | 98.25(12)  |
|                         |            | N(2)-Pt(1)-O(3)   | 98.11(11)  |
|                         |            | N(1)-Pt(1)-O(3)   | 86.60(10)  |
|                         |            | O(1)-Pt(1)-O(3)   | 81.81(10)  |
| <b>4-PF<sub>6</sub></b> |            |                   |            |
| <b>Distances (Å)</b>    |            | <b>Angles (°)</b> |            |
| Pt(1)-C(1)              | 2.021(5)   | C(1)-Pt(1)-N(2)   | 90.94(18)  |
| Pt(1)-N(1)              | 2.055(4)   | C(1)-Pt(1)-N(1)   | 81.31(18)  |
| Pt(1)-C(14)             | 2.021(5)   | C(1)-Pt(1)-C(14)  | 85.8(3)    |
| Pt(1)-N(2)              | 2.055(4)   | C(14)-Pt(1)-N(2)  | 81.31(18)  |
| Pt(1)-N(3)              | 2.126(4)   | C(14)-Pt(1)-N(1)  | 90.94(18)  |
| Pt(1)-N(4)              | 2.126(4)   | C(14)-Pt(1)-N(4)  | 97.64(17)  |
|                         |            | N(1)-Pt(1)-N(4)   | 97.66(15)  |
|                         |            | N(2)-Pt(1)-N(4)   | 90.51(15)  |
|                         |            | C(1)-Pt(1)-N(3)   | 97.64(17)  |
|                         |            | N(1)-Pt(1)-N(3)   | 90.51(15)  |
|                         |            | N(2)-Pt(1)-N(3)   | 97.66(15)  |
|                         |            | N(4)-Pt(1)-N(3)   | 78.9(2)    |



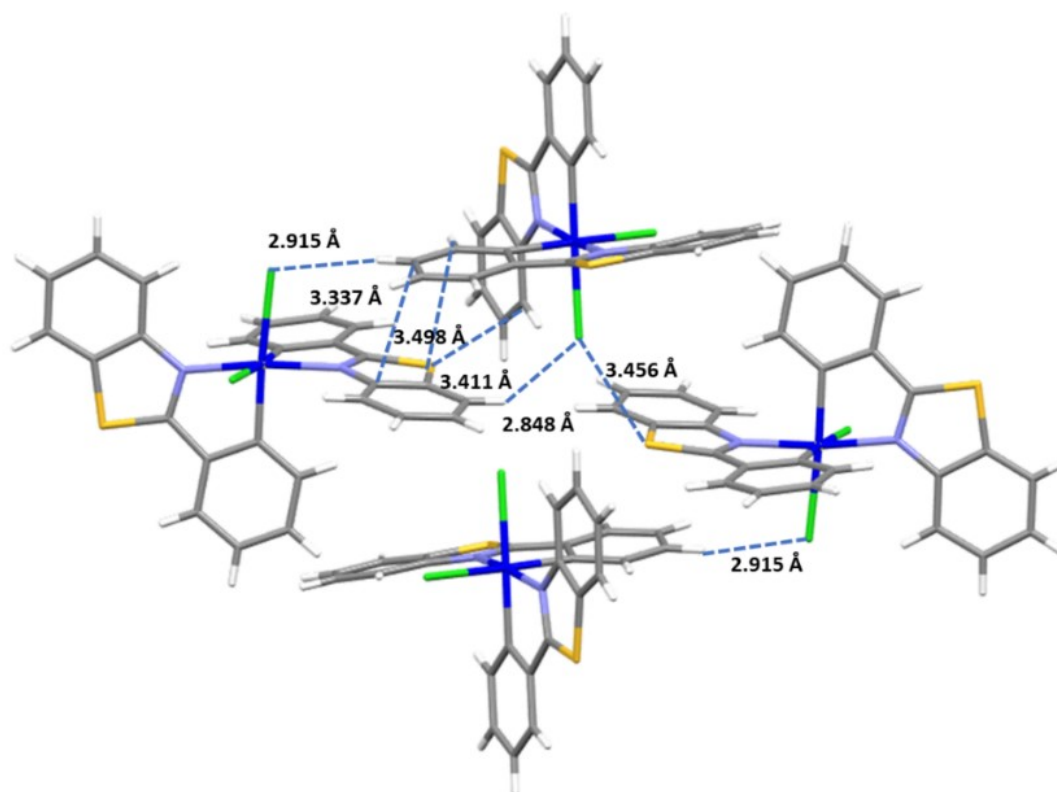

**Figure S9.** Crystal Packing of 2 showing some intermolecular contacts

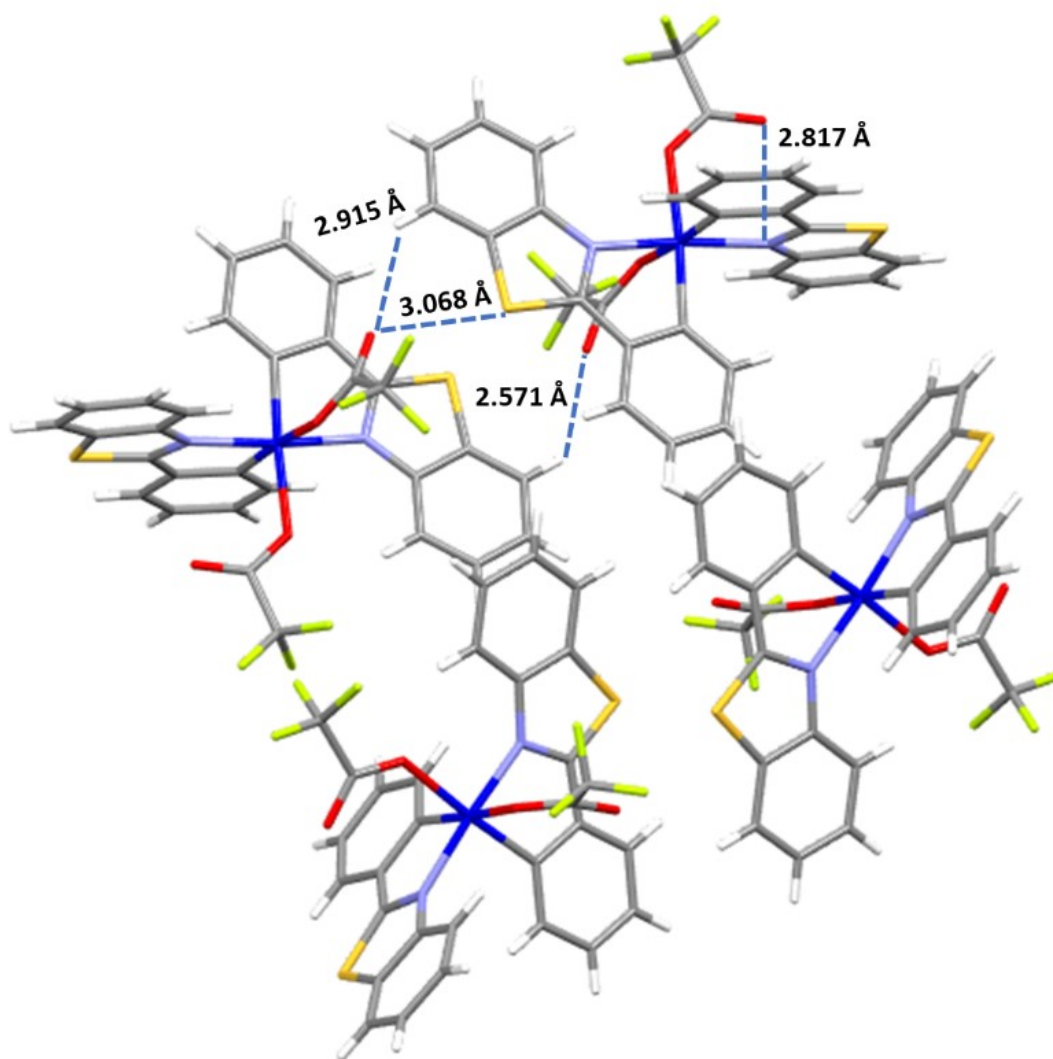

**Figure S10.** Crystal Packing of **3** showing some intermolecular contacts

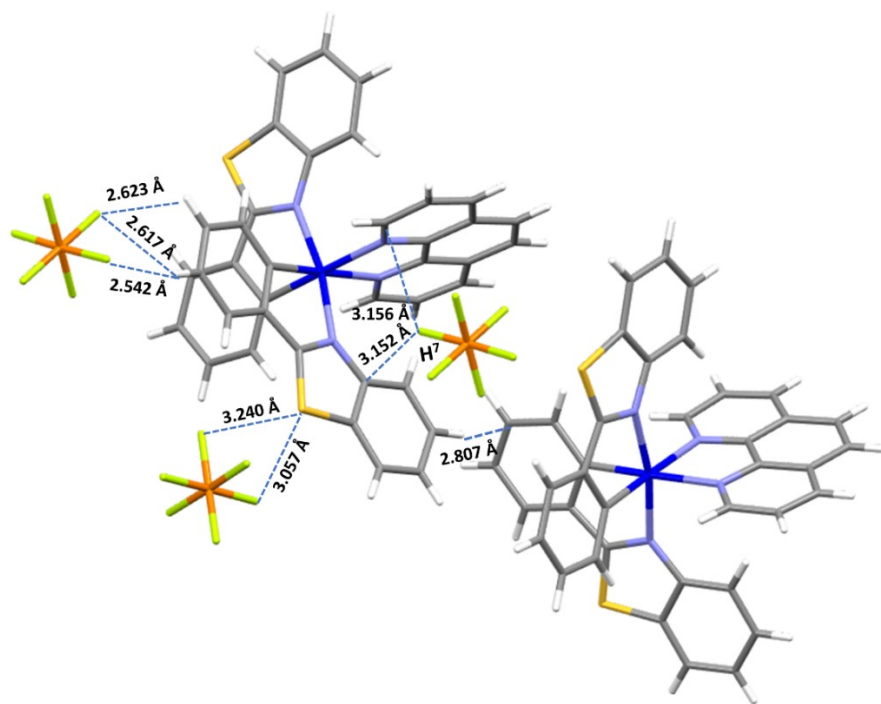

**Figure S11.** Crystal Packing of 4-PF<sub>6</sub> showing some intermolecular contacts

#### 4. Photophysical Properties and Theoretical Calculations

| Table S3. UV-Vis absorption data in CH <sub>2</sub> Cl <sub>2</sub> solution (5 x 10 <sup>-5</sup> M)                                  |                                                                                                      |
|----------------------------------------------------------------------------------------------------------------------------------------|------------------------------------------------------------------------------------------------------|
| Complex                                                                                                                                | $\lambda$ /nm ( $\epsilon \times 10^{-3} / \text{mol}^{-1} \cdot \text{L} \cdot \text{cm}^{-1}$ )    |
| [Pt(pbt)Cl(Hpbt- $\kappa$ N)]<br><b>1</b>                                                                                              | 254 (23.74), 270 (21.05), 306 (21.40), 335 (12.69), 367 (4.02), 407 (2.87), 425 (2.62)               |
| [Pt(pbt) <sub>2</sub> Cl <sub>2</sub> ]<br><b>2</b>                                                                                    | 258 (19.52), 316 (20.57), 347 (18.33), 363 (13.55)                                                   |
| [Pt(pbt) <sub>2</sub> (OCOCF <sub>3</sub> ) <sub>2</sub> ]<br><b>3</b>                                                                 | 256 (17.95), 322 (20.96), 346 (19.31), 366 (11.52)                                                   |
| [Pt(pbt) <sub>2</sub> (phen)](CF <sub>3</sub> CO <sub>2</sub> ) <sub>2</sub><br><b>4-CF<sub>3</sub>CO<sub>2</sub></b>                  | 264 (31.45), 266 (31.10), 292 (15.62), 321 (18.29), 349 (17.95), 366 (11.10)                         |
| [Pt(pbt) <sub>2</sub> (phen)](PF <sub>6</sub> ) <sub>2</sub><br><b>4-PF<sub>6</sub></b>                                                | 261 (37.45), 304 (17.66), 345 (12.80), 367 (2.35)                                                    |
| [Pt(pbt) <sub>2</sub> (pyraphen)](CF <sub>3</sub> CO <sub>2</sub> ) <sub>2</sub><br><b>5-CF<sub>3</sub>CO<sub>2</sub></b>              | 257 (66.03), 307 (27.40), 341 (25.42), 367 (13.22)                                                   |
| [Pt(pbt) <sub>2</sub> (pyraphen)](PF <sub>6</sub> ) <sub>2</sub><br><b>5-PF<sub>6</sub></b>                                            | 270 (20.17), 277 (19.50), 304 (7.76), 350 (7.64), 367 (4.80)                                         |
| [Pt(pbt) <sub>2</sub> (NH <sub>2</sub> -phen)](CF <sub>3</sub> CO <sub>2</sub> ) <sub>2</sub><br><b>6-CF<sub>3</sub>CO<sub>2</sub></b> | 252 (33.25), 266 (27.24), 276 (21.58), 310 (30.68), 348 (24.11), 366 (18.02), 400 (4.85), 480 (1.10) |
| [Pt(pbt) <sub>2</sub> (NH <sub>2</sub> -phen)](PF <sub>6</sub> ) <sub>2</sub><br><b>6-PF<sub>6</sub></b>                               | 250 (18.15), 266 (15.64), 306 (21.21), 350 (14.76), 367 (10.59), 389 (2.20), 443 (0.83)              |

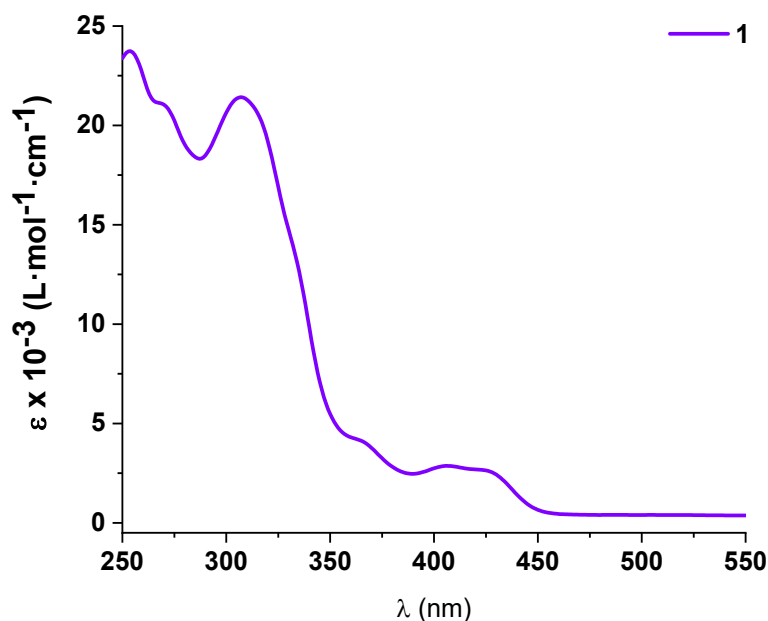

**Figure S12.** UV-Vis absorption spectra for complex **1** in CH<sub>2</sub>Cl<sub>2</sub> solution (5 x 10<sup>-5</sup> M) at 298 K

**Table S4.** DFT optimized geometries for ground state and triplet state (in CH<sub>2</sub>Cl<sub>2</sub>)

| 2                                                                                 |              |                                                                                    |          |
|-----------------------------------------------------------------------------------|--------------|------------------------------------------------------------------------------------|----------|
| $S_0$                                                                             |              | $T_1$                                                                              |          |
| 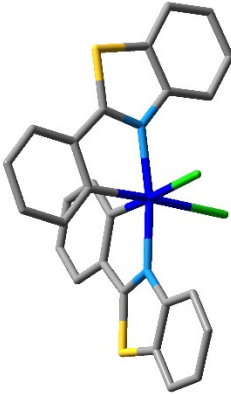 |              |  |          |
|                                                                                   | <i>X-Ray</i> | $S_0$                                                                              | $T_1$    |
| Pt(1)-C(1)                                                                        | 2.025 (2)    | 2.0385                                                                             | 2.0385   |
| Pt(1)-N(1)                                                                        | 2.0491 (2)   | 2.0882                                                                             | 2.0882   |
| Pt(1)-C(14)                                                                       | 2.022 (2)    | 2.0384                                                                             | 2.0384   |
| Pt(1)-N(2)                                                                        | 2.0386 (2)   | 2.0883                                                                             | 2.0883   |
| Pt(1)-Cl(1)                                                                       | 2.4439 (6)   | 2.5440                                                                             | 2.5440   |
| Pt(1)-Cl(2)                                                                       | 2.4418 (6)   | 2.5452                                                                             | 2.5452   |
| C(1)-Pt(1)-N(2)                                                                   | 91.11 (8)    | 93.6235                                                                            | 93.5908  |
| C(1)-Pt(1)-N(1)                                                                   | 81.14 (9)    | 80.4590                                                                            | 80.4567  |
| C(1)-Pt(1)-C(14)                                                                  | 90.80 (9)    | 89.9957                                                                            | 89.9956  |
| C(14)-Pt(1)-N(2)                                                                  | 81.00 (9)    | 80.4567                                                                            | 80.4590  |
| C(14)-Pt(1)-N(1)                                                                  | 93.76 (9)    | 93.5908                                                                            | 93.6235  |
| C(1)-Pt(1)-Cl(2)                                                                  | 90.91 (7)    | 89.2451                                                                            | 89.5442  |
| N(2)-Pt(1)-Cl(2)                                                                  | 102.52 (6)   | 102.0679                                                                           | 102.1023 |
| N(1)-Pt(1)-Cl(2)                                                                  | 82.99 (6)    | 83.8360                                                                            | 83.7980  |
| C(14)-Pt(1)-Cl(1)                                                                 | 87.94 (6)    | 89.5443                                                                            | 89.2451  |
| N(2)-Pt(1)-Cl(1)                                                                  | 85.53 (6)    | 83.7980                                                                            | 83.8360  |
| N(1)-Pt(1)-Cl(1)                                                                  | 102.14 (6)   | 102.1023                                                                           | 102.0679 |
| Cl(2)-Pt(1)-Cl(1)                                                                 | 90.55 (2)    | 91.3237                                                                            | 91.3237  |

| 3                |              |         |         |
|------------------|--------------|---------|---------|
| $S_0$            |              | $T_1$   |         |
|                  |              |         |         |
|                  | <i>X-Ray</i> | $S_0$   | $T_1$   |
| Pt(1)-C(1)       | 2.013 (3)    | 2.0297  | 2.0261  |
| Pt(1)-N(1)       | 2.031 (2)    | 2.0780  | 2.0863  |
| Pt(1)-C(14)      | 2.031 (4)    | 2.0297  | 2.0346  |
| Pt(1)-N(2)       | 2.029 (3)    | 2.0779  | 2.0569  |
| Pt(1)-O(1)       | 2.133 (2)    | 2.1956  | 2.2087  |
| Pt(1)-O(3)       | 2.158 (3)    | 2.1956  | 2.2188  |
| C(1)-Pt(1)-N(2)  | 92.05 (12)   | 93.6317 | 93.9035 |
| C(1)-Pt(1)-N(1)  | 81.83 (12)   | 80.7604 | 80.6942 |
| C(1)-Pt(1)-C(14) | 87.11 (13)   | 88.0882 | 87.8366 |
| N(2)-Pt(1)-C(14) | 80.57 (15)   | 80.7596 | 81.6712 |
| N(1)-Pt(1)-C(14) | 95.25 (13)   | 93.6355 | 93.7166 |
| N(2)-Pt(1)-O(1)  | 92.04 (9)    | 90.3444 | 90.3743 |
| N(1)-Pt(1)-O(1)  | 94.04(10)    | 95.5724 | 95.2599 |
| C(14)-Pt(1)-O(1) | 92.92(12)    | 95.7405 | 95.7584 |
| C(1)-Pt(1)-O(3)  | 98.25(12)    | 95.7442 | 96.0490 |
| N(2)-Pt(1)-O(3)  | 98.11(11)    | 95.5733 | 95.5733 |
| N(1)-Pt(1)-O(3)  | 86.60(10)    | 90.3410 | 90.4192 |
| O(1)-Pt(1)-O(3)  | 81.81(10)    | 80.6439 | 80.6080 |

| $4^{2+}$         |              |          |          |
|------------------|--------------|----------|----------|
| $S_0$            |              | $T_1$    |          |
|                  |              |          |          |
|                  | <i>X-Ray</i> | $S_0$    | $T_1$    |
| Pt(1)-C(1)       | 2.021(5)     | 2.0372   | 2.0374   |
| Pt(1)-N(1)       | 2.055(4)     | 2.0899   | 2.0882   |
| Pt(1)-C(14)      | 2.021(5)     | 2.0377   | 2.0381   |
| Pt(1)-N(2)       | 2.055(4)     | 2.0884   | 2.0871   |
| Pt(1)-N(3)       | 2.126(4)     | 2.2392   | 2.2384   |
| Pt(1)-N(4)       | 2.126(4)     | 2.2374   | 2.2373   |
| C(1)-Pt(1)-N(2)  | 90.94(18)    | 93.7396  | 93.7900  |
| C(1)-Pt(1)-N(1)  | 81.31(18)    | 80.5000  | 80.5300  |
| C(1)-Pt(1)-C(14) | 85.8(3)      | 88.9888  | 88.7632  |
| C(14)-Pt(1)-N(2) | 81.31(18)    | 80.5224  | 80.5380  |
| C(14)-Pt(1)-N(1) | 90.94(18)    | 93.7475  | 93.8107  |
| C(14)-Pt(1)-N(4) | 97.64(17)    | -        | -        |
| N(1)-Pt(1)-N(4)  | 97.66(15)    | 85.2987  | 85.4532  |
| N(2)-Pt(1)-N(4)  | 90.51(15)    | 101.0633 | 100.8311 |
| C(1)-Pt(1)-N(3)  | 97.64(17)    | -        | -        |
| N(1)-Pt(1)-N(3)  | 90.51(15)    | 100.8999 | 100.6109 |
| N(2)-Pt(1)-N(3)  | 97.66(15)    | 85.4947  | 85.7075  |
| N(4)-Pt(1)-N(3)  | 78.9(2)      | 75.6670  | 75.0290  |

| $5^{2+}$                                                                          |              |                                                                                    |          |
|-----------------------------------------------------------------------------------|--------------|------------------------------------------------------------------------------------|----------|
| $S_0$                                                                             |              | $T_1$                                                                              |          |
| 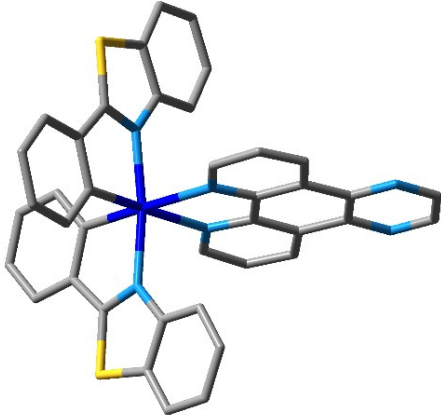 |              |  |          |
|                                                                                   | <i>X-Ray</i> | $S_0$                                                                              | $T_1$    |
| Pt(1)-C(1)                                                                        |              | 2.0372                                                                             | 2.0377   |
| Pt(1)-N(1)                                                                        |              | 2.0895                                                                             | 2.0897   |
| Pt(1)-C(14)                                                                       |              | 2.0372                                                                             | 2.0377   |
| Pt(1)-N(2)                                                                        |              | 2.0895                                                                             | 2.0897   |
| Pt(1)-N(3)                                                                        |              | 2.2392                                                                             | 2.2291   |
| Pt(1)-N(4)                                                                        |              | 2.2392                                                                             | 2.2291   |
| C(1)-Pt(1)-N(2)                                                                   |              | 93.7024                                                                            | 93.6798  |
| C(1)-Pt(1)-N(1)                                                                   |              | 80.5207                                                                            | 80.4967  |
| C(1)-Pt(1)-C(14)                                                                  |              | 88.7520                                                                            | 88.8522  |
| C(14)-Pt(1)-N(2)                                                                  |              | 80.5208                                                                            | 80.4967  |
| C(14)-Pt(1)-N(1)                                                                  |              | 93.7017                                                                            | 93.6790  |
| C(14)-Pt(1)-N(4)                                                                  |              | -                                                                                  | -        |
| N(1)-Pt(1)-N(4)                                                                   |              | 85.3883                                                                            | 85.4404  |
| N(2)-Pt(1)-N(4)                                                                   |              | 101.0262                                                                           | 101.0133 |
| C(1)-Pt(1)-N(3)                                                                   |              | -                                                                                  | -        |
| N(1)-Pt(1)-N(3)                                                                   |              | 101.0264                                                                           | 101.0126 |
| N(2)-Pt(1)-N(3)                                                                   |              | 85.3876                                                                            | 85.4404  |
| N(4)-Pt(1)-N(3)                                                                   |              | 75.3755                                                                            | 75.7815  |



| $6^{2+}$         |              |          |          |
|------------------|--------------|----------|----------|
| $S_0$            |              | $T_1$    |          |
|                  |              |          |          |
|                  | <i>X-Ray</i> | $S_0$    | $T_1$    |
| Pt(1)-C(1)       |              | 2.0386   | 2.0370   |
| Pt(1)-N(1)       |              | 2.0905   | 2.0905   |
| Pt(1)-C(14)      |              | 2.0392   | 2.0381   |
| Pt(1)-N(2)       |              | 2.0889   | 2.0756   |
| Pt(1)-N(3)       |              | 2.2364   | 2.2507   |
| Pt(1)-N(4)       |              | 2.2259   | 2.2369   |
| C(1)-Pt(1)-N(2)  |              | 93.8141  | 94.2081  |
| C(1)-Pt(1)-N(1)  |              | 80.4658  | 80.4526  |
| C(1)-Pt(1)-C(14) |              | 88.6261  | 88.7312  |
| C(14)-Pt(1)-N(2) |              | 80.4936  | 80.3255  |
| C(14)-Pt(1)-N(1) |              | 93.8681  | 93.6146  |
| C(14)-Pt(1)-N(4) |              | -        | -        |
| N(1)-Pt(1)-N(4)  |              | 85.4853  | 85.5137  |
| N(2)-Pt(1)-N(4)  |              | 100.7751 | 100.2110 |
| C(1)-Pt(1)-N(3)  |              | -        | -        |
| N(1)-Pt(1)-N(3)  |              | 100.9519 | 101.0276 |
| N(2)-Pt(1)-N(3)  |              | 83.3482  | 84.7959  |
| N(4)-Pt(1)-N(3)  |              | 75.7489  | 75.3589  |

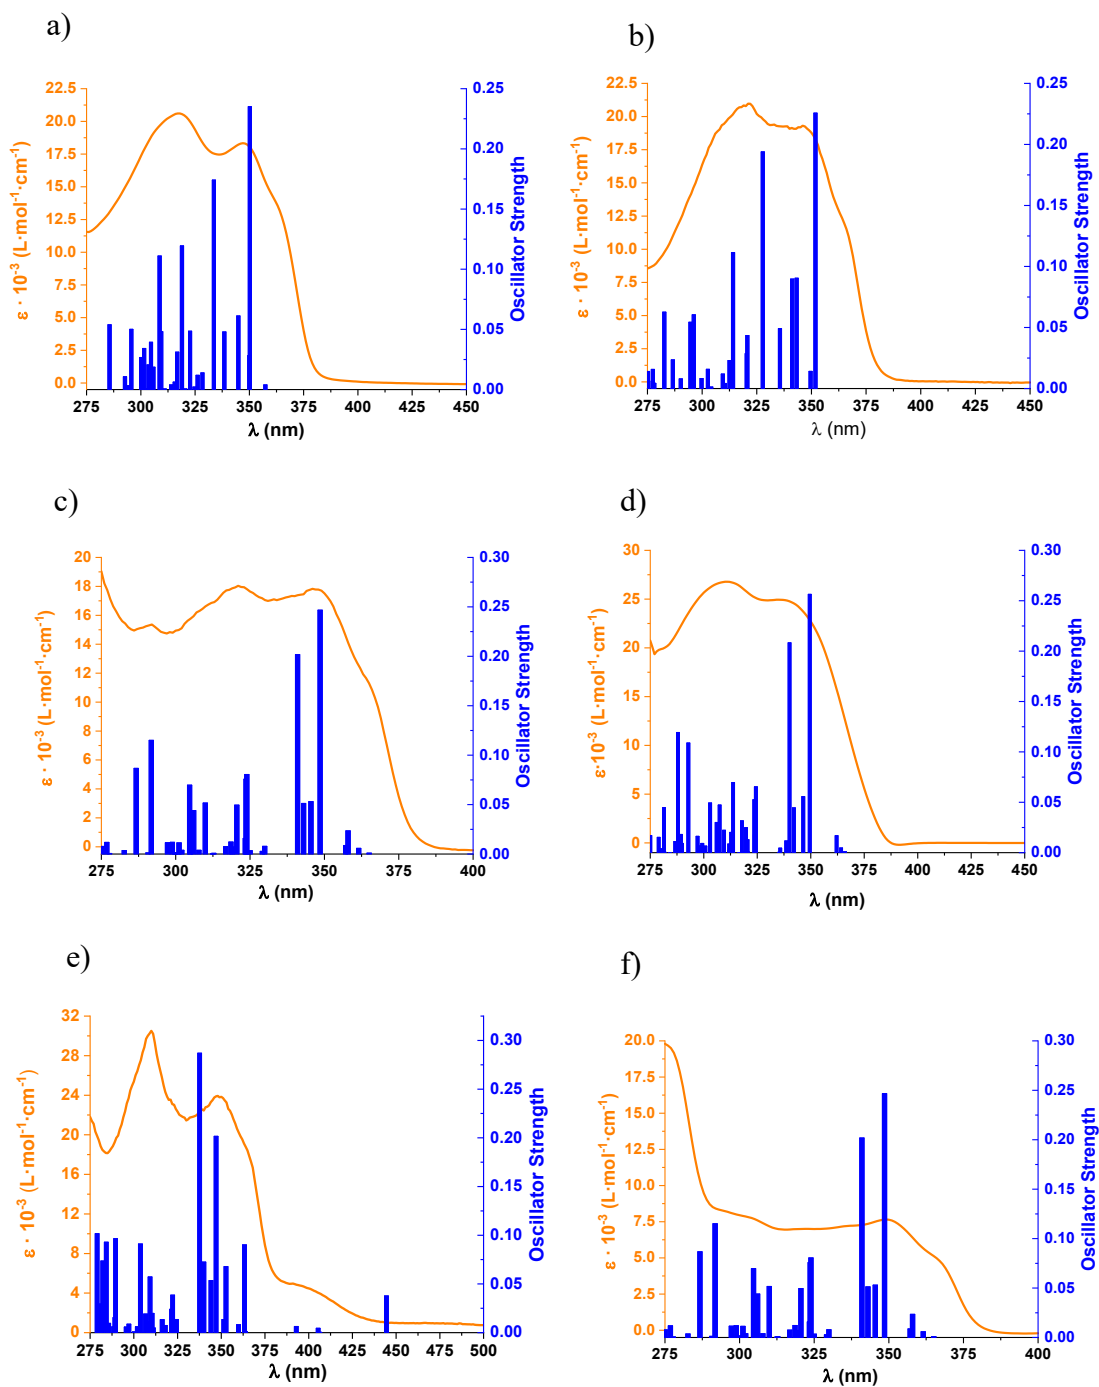

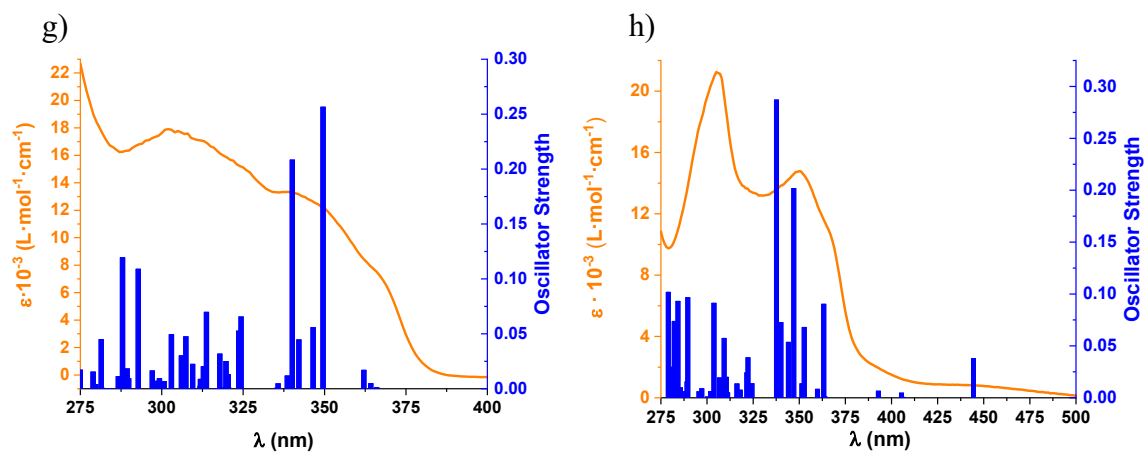

**Figure S13.** UV-Vis absorption experimental spectra (orange) and calculated transitions (blue) in  $\text{CH}_2\text{Cl}_2$  for a) **2**, b) **3**, c) **4-CF<sub>3</sub>CO<sub>2</sub>**, d) **5-CF<sub>3</sub>CO<sub>2</sub>**, e) **6-CF<sub>3</sub>CO<sub>2</sub>**, f) **4-PF<sub>6</sub>**, g) **5-PF<sub>6</sub>** and h) **6-PF<sub>6</sub>**

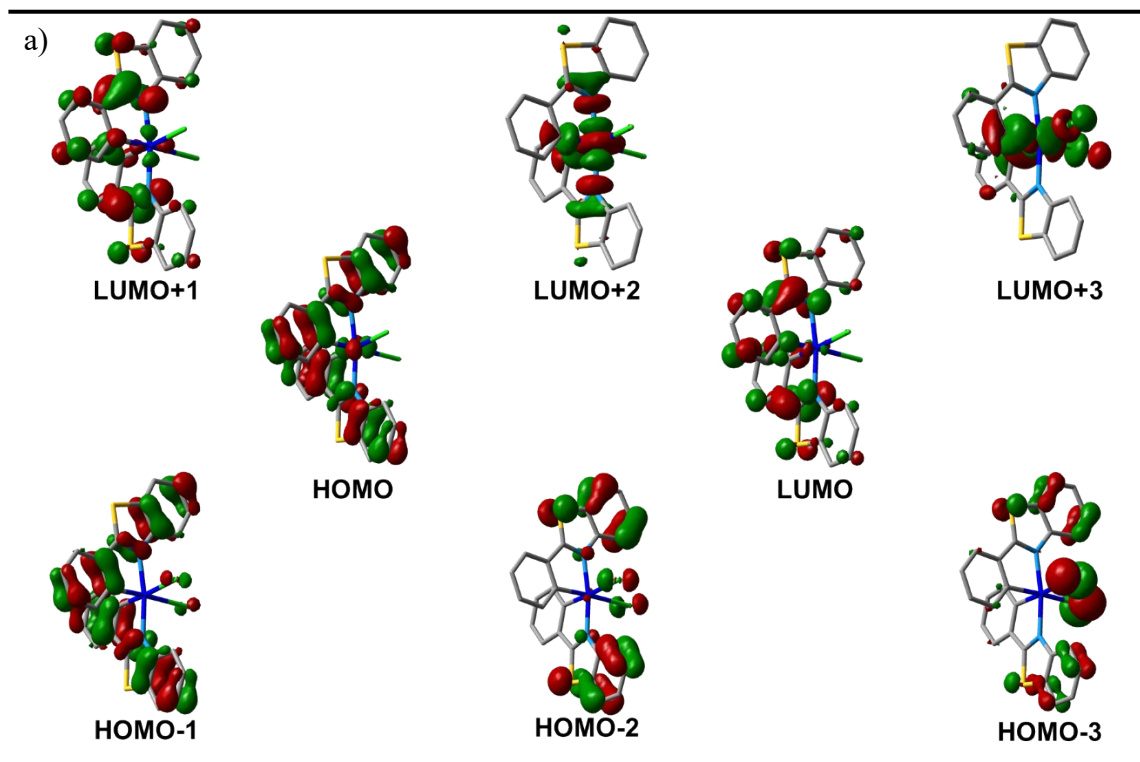

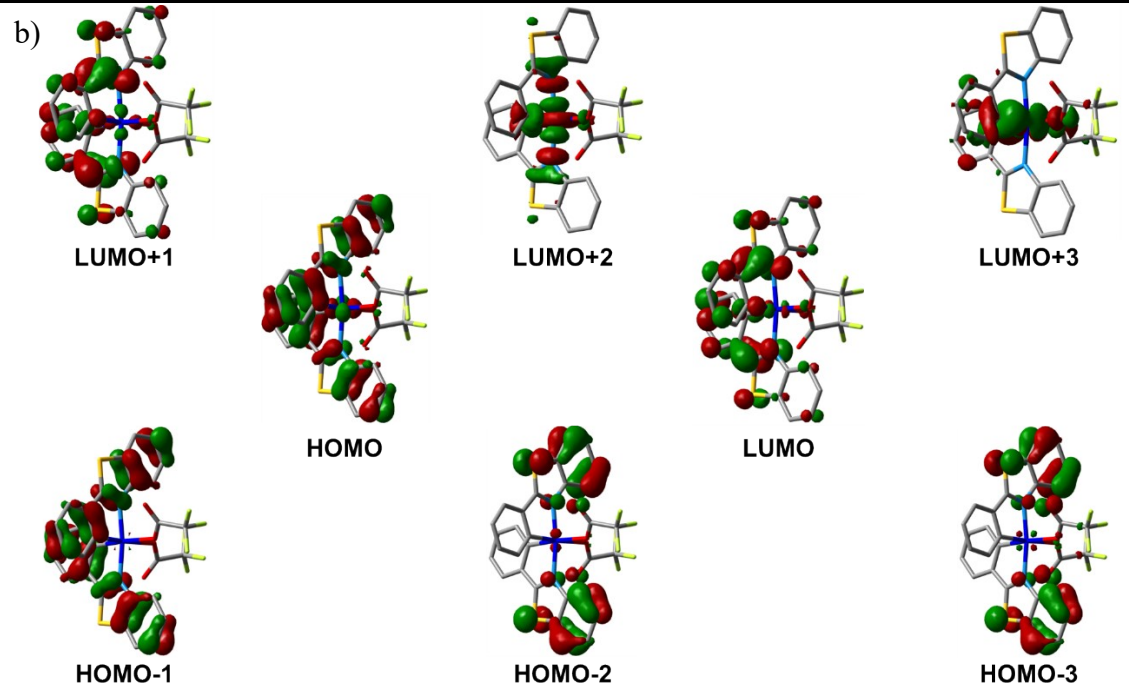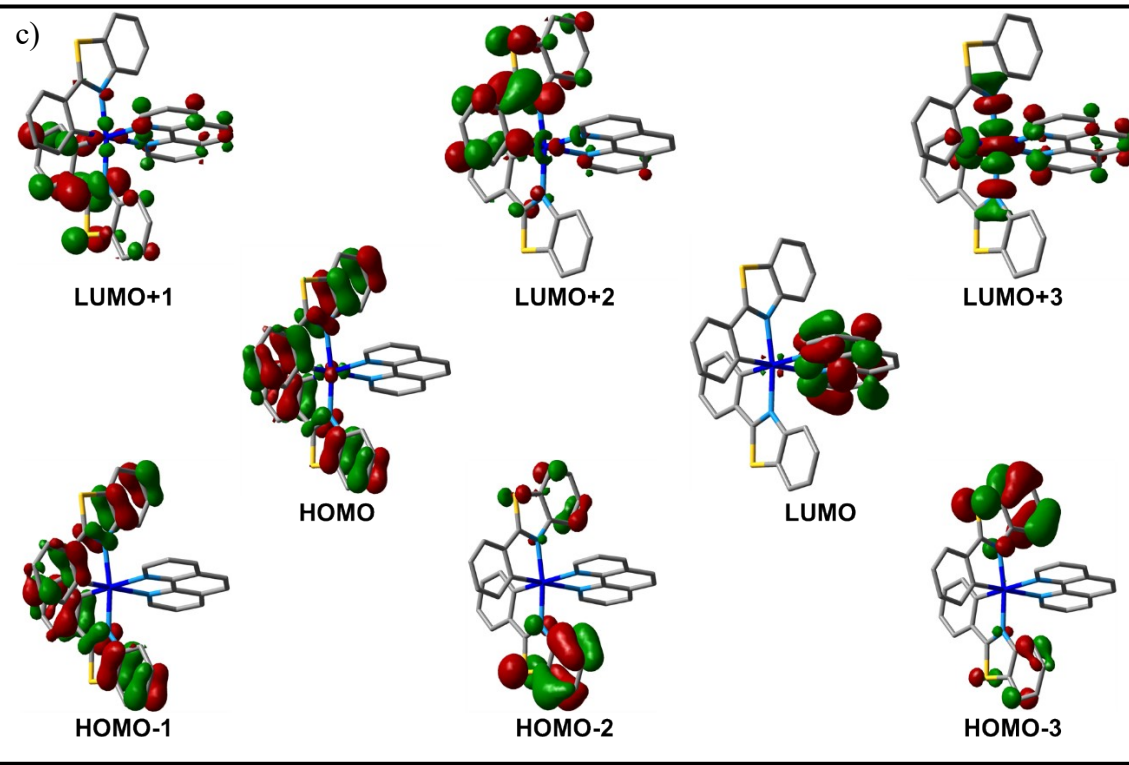

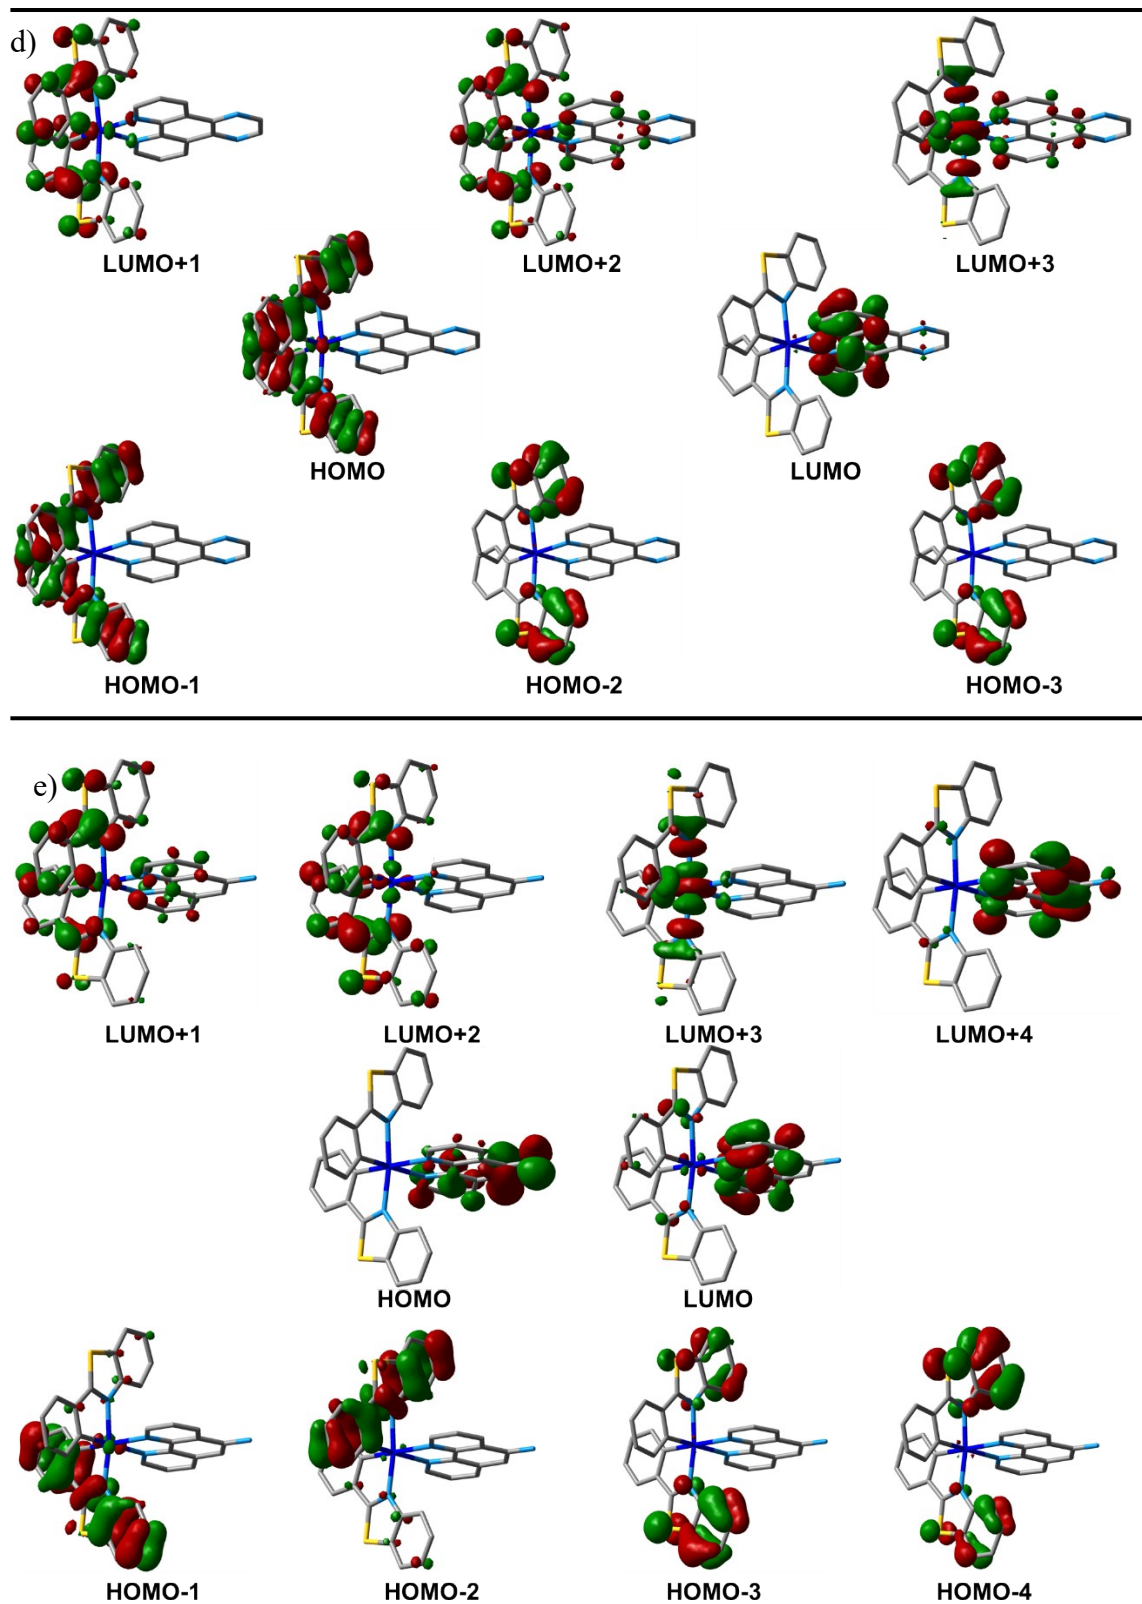

**Figure S14.** Selected frontier Molecular Orbitals for a) **2**, b) **3**, c)  $4^{2+}$ , d)  $5^{2+}$  and e)  $6^{2+}$  in the ground state.

**Table S5.** Selected vertical excitation energies singlets ( $S_0$ ) and first triplets computed by TD-DFT/SCRF ( $\text{CH}_2\text{Cl}_2$ ) with the orbitals involved.

| Complex         | State           | $\lambda/\text{nm}$ | $f$                                                            | Transition (% Contribution)                                                      | Character               |
|-----------------|-----------------|---------------------|----------------------------------------------------------------|----------------------------------------------------------------------------------|-------------------------|
| 2               | T <sub>1</sub>  | 468.7               | -                                                              | H-1→L+1 (38%), HOMO→LUMO (45%)                                                   | IL                      |
|                 | T <sub>2</sub>  | 468.6               | -                                                              | H-1→LUMO (45%), HOMO→L+1 (39%)                                                   | IL                      |
|                 | T <sub>3</sub>  | 386.3               | -                                                              | H-7→L+2 (12%), HOMO→L+2 (60%)                                                    | LMCT/IL/L'MCT           |
|                 | S <sub>1</sub>  | 357.4               | 0.0039                                                         | HOMO→L+1 (28%). HOMO→L+2 (61%)                                                   | IL/LMCT                 |
|                 | S <sub>2</sub>  | <b>350.2</b>        | <b>0.235</b>                                                   | <b>HOMO→LUMO (87%)</b>                                                           | <b>IL</b>               |
|                 | S <sub>3</sub>  | 350.0               | 0.0282                                                         | H-1→L+1 (43%). H-1→L+2 (48%)                                                     | IL/LMCT                 |
|                 | S <sub>4</sub>  | 344.9               | 0.0612                                                         | H-1→LUMO (90%)                                                                   | IL                      |
|                 | S <sub>5</sub>  | 338.5               | 0.0479                                                         | HOMO→L+1 (65%). HOMO→L+2 (26%)                                                   | IL/LMCT                 |
|                 | S <sub>6</sub>  | <b>333.7</b>        | <b>0.174</b>                                                   | <b>H-1→L+1 (43%). H-1→L+2 (46%)</b>                                              | <b>IL/LMCT</b>          |
|                 | S <sub>7</sub>  | 328.4               | 0.014                                                          | H-4→L+1 (17%). H-4→L+2 (14%).<br>H-3→L+1 (19%). H-3→L+2 (15%)                    | IL/L'LCT/L'MCT/<br>LMCT |
|                 | S <sub>8</sub>  | 326.2               | 0.012                                                          | H-4→LUMO (20%). H-3→LUMO (48%)                                                   | IL/L'LCT                |
|                 | S <sub>9</sub>  | 324.7               | 0.002                                                          | H-7→L+1 (11%). H-7→L+2 (14%).<br>H-6→LUMO (15%). H-5→L+1 (27%).<br>H-5→L+2 (25%) | IL/L'LCT/L'MCT          |
|                 | S <sub>10</sub> | 322.7               | 0.049                                                          | H-7→LUMO (12%). H-6→L+1 (29%).<br>H-6→L+2 (19%). H-5→LUMO (15%)                  | IL/L'LCT/L'MCT/<br>MLCT |
| S <sub>11</sub> | 320.5           | 0.001               | H-7→L+1 (10%). H-7→L+2 (14%).<br>H-3→LUMO (22%). H-2→L+1 (27%) | IL/L'LCT/L'MCT                                                                   |                         |
| S <sub>12</sub> | 319.0           | 0.119               | H-3→L+1 (14%). H-2→LUMO (71%)                                  | IL/L'LCT                                                                         |                         |
| 3               | T <sub>1</sub>  | 469.7               | -                                                              | H-1→L+1 (40%). HOMO→LUMO (49%)                                                   | IL                      |
|                 | T <sub>2</sub>  | 469.2               | -                                                              | H-1→LUMO (49%). HOMO→L+1 (41%)                                                   | IL                      |
|                 | T <sub>3</sub>  | 378.3               | -                                                              | H-3→L+1 (35%). H-2→LUMO (46%)                                                    | IL                      |
|                 | S <sub>1</sub>  | <b>351.8</b>        | <b>0.2257</b>                                                  | <b>HOMO→LUMO (92%)</b>                                                           | <b>IL</b>               |
|                 | S <sub>2</sub>  | 349.6               | 0.0141                                                         | HOMO→L+1 (38%). HOMO→L+2 (54%)                                                   | IL/LMCT                 |
|                 | S <sub>3</sub>  | 343.2               | 0.0904                                                         | H-1→LUMO (96%)                                                                   | IL                      |
|                 | S <sub>4</sub>  | 341.2               | 0.0897                                                         | H-1→L+1 (53%). H-1→L+2 (43%)                                                     | IL/LMCT                 |
|                 | S <sub>5</sub>  | 335.6               | 0.0492                                                         | HOMO→L+1 (56%). HOMO→L+2 (37%)                                                   | IL/LMCT                 |
|                 | S <sub>6</sub>  | <b>327.7</b>        | <b>0.1939</b>                                                  | <b>H-1→L+1 (43%). H-1→L+2 (51%)</b>                                              | <b>IL/LMCT</b>          |
| S <sub>7</sub>  | 320.7           | 0.0434              | H-4→LUMO (15%). H-3→L+1 (18%).<br>H-2→LUMO (54%)               | IL/L'LCT                                                                         |                         |
| S <sub>8</sub>  | 320.4           | 0.0286              | H-5→LUMO (14%). H-3→LUMO (59%).<br>H-2→L+1 (13%)               | IL/L'LCT                                                                         |                         |

|                 |                 |              |                                |                                                               |                           |
|-----------------|-----------------|--------------|--------------------------------|---------------------------------------------------------------|---------------------------|
|                 | S <sub>9</sub>  | 314.1        | 0.1114                         | H-5→L+1 (10%). H-4→LUMO (60%). H-2→LUMO (20%)                 | IL/L'LCT                  |
|                 | S <sub>10</sub> | 312.6        | 0.0229                         | H-5→LUMO (47%). H-4→L+1 (24%). H-3→LUMO (16%)                 | IL/L'LCT                  |
|                 | S <sub>11</sub> | 310.5        | 0.0042                         | H-4→L+1 (12%). H-4→L+2 (15%). H-2→L+1 (33%). H-2→L+2 (18%)    | IL/L'LCT/LMCT/L'MCT       |
|                 | S <sub>12</sub> | 309.5        | 0.0119                         | H-5→L+1 (12%). H-3→L+1 (46%). H-3→L+2 (11%). H-2→LUMO (18%)   | IL/L'LCT/LMCT             |
| 4 <sup>2+</sup> | T <sub>1</sub>  | 470.9        | -                              | H-1→L+1 (32%). H-1→L+4 (10%). HOMO→L+1 (14%). HOMO→L+2 (29%)  | IL/LL'CT/LLCT             |
|                 | T <sub>2</sub>  | 470.6        | -                              | H-1→L+2 (37%). HOMO→L+1 (20%). HOMO→L+2 (15%). HOMO→L+4 (10%) | IL/LL'CT/LLCT             |
|                 | T <sub>3</sub>  | 432.3        | -                              | H-1→L+1 (32%). H-1→L+4 (10%). HOMO→L+1 (14%). HOMO→L+2 (29%)  | IL/LL'CT/LLCT             |
|                 | S <sub>1</sub>  | 365.0        | 0.0009                         | HOMO→L+1 (14%). HOMO→L+3 (67%)                                | IL/LL'CT/LLCT/LMCT        |
|                 | S <sub>2</sub>  | 361.5        | 0.0058                         | H-1→L+1 (14%). H-1→L+3 (61%). HOMO→LUMO (11%)                 | IL/LL'CT/LLCT/LMCT        |
|                 | S <sub>3</sub>  | <b>358.0</b> | <b>0.0234</b>                  | <b>HOMO→LUMO (82%)</b>                                        | <b>LL'CT</b>              |
|                 | S <sub>4</sub>  | 357.1        | 0.0087                         | H-1→LUMO (89%)                                                | LL'CT                     |
|                 | S <sub>5</sub>  | <b>348.6</b> | <b>0.2467</b>                  | <b>HOMO→L+1 (25%). HOMO→L+2 (69%)</b>                         | <b>IL/LLCT/LL'CT</b>      |
|                 | S <sub>6</sub>  | 345.5        | 0.0530                         | H-1→L+1 (25%). H-1→L+2 (70%)                                  | IL/LLCT/LL'CT             |
|                 | S <sub>7</sub>  | 343.0        | 0.0512                         | HOMO→L+1 (56%). HOMO→L+2 (20%). HOMO→L+3 (18%)                | IL/LLCT/LL'CT/LMCT        |
|                 | S <sub>8</sub>  | <b>341.0</b> | <b>0.2018</b>                  | <b>H-1→L+1 (54%). H-1→L+2 (20%). H-1→L+3 (22%)</b>            | <b>IL/LLCT/LL'CT/LMCT</b> |
|                 | S <sub>9</sub>  | 329.9        | 0.0078                         | H-2→LUMO (92%)                                                | LL'CT                     |
|                 | S <sub>10</sub> | 329.1        | 0.0027                         | H-3→LUMO (95%)                                                | LL'CT                     |
| S <sub>11</sub> | 325.0           | 0.0034       | HOMO→L+3 (10%). HOMO→L+4 (79%) | IL/LL'CT/LMCT                                                 |                           |
| S <sub>12</sub> | 323.9           | 0.0805       | H-1→L+4 (88%)                  | IL/LL'CT                                                      |                           |
| 5 <sup>2+</sup> | T <sub>1</sub>  | 471.1        | -                              | H-1→L+2 (34%), HOMO→L+1 (45%)                                 | IL                        |
|                 | T <sub>2</sub>  | 470.8        | -                              | H-1→L+1 (46%), HOMO→L+2 (34%)                                 | IL                        |
|                 | T <sub>3</sub>  | 410.6        | -                              | H-8→LUMO (36%), H-7→L+5 (19%)                                 | IL'/L'LCT                 |
|                 | S <sub>1</sub>  | 366.5        | 0.0000                         | H-1→LUMO (20%), HOMO→L+2 (18%), HOMO→L+3 (55%)                | IL/LL'CT/LMCT             |
|                 | S <sub>2</sub>  | <b>366.0</b> | <b>0.0009</b>                  | <b>HOMO→LUMO (89%)</b>                                        | <b>LL'CT</b>              |
|                 | S <sub>3</sub>  | 364.2        | 0.0047                         | H-1→LUMO (79%), HOMO→L+3 (11%)                                | IL/LL'CT/LMCT             |
|                 | S <sub>4</sub>  | 362.1        | 0.0168                         | H-1→L+2 (26%), H-1→L+3 (58%), HOMO→LUMO (10%)                 | IL/LL'CT/LMCT             |
|                 | S <sub>5</sub>  | <b>349.5</b> | <b>0.2564</b>                  | <b>HOMO→L+1 (93%)</b>                                         | <b>IL</b>                 |

|                       |                       |              |                              |                                                                |                        |
|-----------------------|-----------------------|--------------|------------------------------|----------------------------------------------------------------|------------------------|
|                       | <b>S<sub>6</sub></b>  | 346.5        | 0.0556                       | H-1→L+1 (96%)                                                  | IL                     |
|                       | <b>S<sub>7</sub></b>  | 342.1        | 0.0445                       | HOMO→L+2 (73%), HOMO→L+3 (21%)                                 | IL/LL'CT/LMCT          |
|                       | <b>S<sub>8</sub></b>  | <b>340.1</b> | <b>0.2082</b>                | <b>H-1→L+2 (69%), H-1→L+3 (25%)</b>                            | <b>IL/LL'CT</b>        |
|                       | <b>S<sub>9</sub></b>  | 338.6        | 0.0116                       | H-5→LUMO (26%), H-5→L+4 (65%)                                  | IL'                    |
|                       | <b>S<sub>10</sub></b> | 335.7        | 0.0045                       | H-2→LUMO (98%)                                                 | LL'CT                  |
|                       | <b>S<sub>11</sub></b> | 335.3        | 0.0004                       | H-3→LUMO (98%)                                                 | LL'CT                  |
|                       | <b>S<sub>12</sub></b> | 324.5        | 0.0001                       | H-3→L+1 (10%), H-2→L+2 (33%),<br>H-2→L+3 (20%), HOMO→L+5 (22%) | IL/LL'CT/LMCT          |
| <b>6<sup>2+</sup></b> | <b>T<sub>1</sub></b>  | 530.5        | -                            | HOMO→LUMO (59%).<br>HOMO→L+1 (13%). HOMO→L+4 (21%)             | IL'CT/L'LCT/<br>L'MCT  |
|                       | <b>T<sub>2</sub></b>  | 513.7        | -                            | HOMO→LUMO (22%).<br>HOMO→L+4 (56%)                             | IL'CT/L'LCT            |
|                       | <b>T<sub>3</sub></b>  | 470.8        | -                            | H-2→L+1 (33%). H-2→L+2 (28%).<br>H-1→L+1 (12%)                 | IL/LLCT/LMCT           |
|                       | <b>S<sub>1</sub></b>  | <b>444.4</b> | <b>0.0377</b>                | <b>HOMO→LUMO (87%).<br/>HOMO→L+1 (11%)</b>                     | <b>IL'CT/L'LCT</b>     |
|                       | <b>S<sub>2</sub></b>  | 406.3        | 0.0004                       | HOMO→LUMO (12%).<br>HOMO→L+1 (81%)                             | IL'CT/L'LCT            |
|                       | <b>S<sub>3</sub></b>  | 405.4        | 0.0045                       | HOMO→L+2 (71%). HOMO→L+3 (22%)                                 | IL'CT/L'LCT/<br>L'MCT  |
|                       | <b>S<sub>4</sub></b>  | 392.9        | 0.0063                       | HOMO→L+2 (21%). HOMO→L+3 (77%)                                 | IL'CT/L'LCT/<br>L'MCT  |
|                       | <b>S<sub>5</sub></b>  | 363.8        | 0.0012                       | H-1→L+2 (17%). H-1→L+3 (64%)                                   | IL/LLCT/LL'CT/<br>LMCT |
|                       | <b>S<sub>6</sub></b>  | <b>363.3</b> | <b>0.0901</b>                | <b>HOMO→L+4 (93%)</b>                                          | <b>IL'CT</b>           |
|                       | <b>S<sub>7</sub></b>  | 359.9        | 0.0082                       | H-2→L+2 (20%). H-2→L+3 (62%)                                   | IL/LLCT/LL'CT/<br>LMCT |
|                       | <b>S<sub>8</sub></b>  | 352.7        | 0.0678                       | H-2→LUMO (27%). H-1→LUMO (69%)                                 | IL/LL'CT               |
|                       | <b>S<sub>9</sub></b>  | 351.4        | 0.0134                       | H-2→LUMO (71%). H-1→LUMO (26%)                                 | IL/LL'CT               |
|                       | <b>S<sub>10</sub></b> | <b>347.0</b> | <b>0.2016</b>                | <b>H-2→L+1 (11%). H-1→L+1 (81%)</b>                            | <b>IL/LL'CT</b>        |
| <b>S<sub>11</sub></b> | 344.1                 | 0.0534       | H-2→L+1 (81%). H-1→L+1 (12%) | IL/LL'CT                                                       |                        |
| <b>S<sub>12</sub></b> | 340.0                 | 0.0725       | H-1→L+2 (67%). H-1→L+3 (19%) | IL/LLCT/LL'CT/<br>LMCT                                         |                        |



**Table S6.** Composition (%) of Frontier MOs in terms of ligands and metals in the ground state in CH<sub>2</sub>Cl<sub>2</sub>.

| 2               |             |    |        |        |                                     |                                     |
|-----------------|-------------|----|--------|--------|-------------------------------------|-------------------------------------|
| Orbital         | Energy (eV) | Pt | pbt(1) | pbt(2) | Cl(1)                               | Cl(2)                               |
| LUMO+3          | -1.44       | 31 | 27     | 27     | 7                                   | 7                                   |
| LUMO+2          | -2.11       | 41 | 28     | 28     | 2                                   | 2                                   |
| LUMO+1          | -2.35       | 6  | 46     | 46     | 1                                   | 1                                   |
| LUMO            | -2.41       | 3  | 47     | 47     | 1                                   | 1                                   |
| HOMO            | -6.54       | 6  | 48     | 44     | 1                                   | 2                                   |
| HOMO-1          | -6.56       | 1  | 45     | 49     | 3                                   | 3                                   |
| HOMO-2          | -6.85       | 1  | 42     | 46     | 6                                   | 5                                   |
| HOMO-3          | -6.86       | 1  | 27     | 23     | 24                                  | 25                                  |
| 3               |             |    |        |        |                                     |                                     |
| Orbital         | Energy (eV) | Pt | pbt(1) | pbt(2) | CF <sub>3</sub> CO <sub>2</sub> (1) | CF <sub>3</sub> CO <sub>2</sub> (2) |
| LUMO+3          | -1.26       | 33 | 28     | 28     | 6                                   | 6                                   |
| LUMO+2          | -2.02       | 44 | 27     | 27     | 1                                   | 1                                   |
| LUMO+1          | -2.33       | 4  | 47     | 47     | 0                                   | 0                                   |
| LUMO            | -2.43       | 4  | 47     | 47     | 1                                   | 1                                   |
| HOMO            | -6.54       | 5  | 46     | 46     | 1                                   | 1                                   |
| HOMO-1          | -6.57       | 1  | 49     | 49     | 0                                   | 0                                   |
| HOMO-2          | -6.88       | 2  | 46     | 46     | 3                                   | 3                                   |
| HOMO-3          | -6.89       | 1  | 43     | 43     | 6                                   | 6                                   |
| 4 <sup>2+</sup> |             |    |        |        |                                     |                                     |
| Orbital         | Energy (eV) | Pt | pbt(1) | pbt(2) | phen                                |                                     |
| LUMO+3          | -3.05       | 36 | 21     | 21     | 22                                  |                                     |
| LUMO+2          | -3.20       | 5  | 10     | 75     | 10                                  |                                     |
| LUMO+1          | -3.20       | 5  | 69     | 5      | 21                                  |                                     |
| LUMO            | -3.31       | 2  | 3      | 2      | 94                                  |                                     |
| HOMO            | -7.31       | 3  | 45     | 52     | 0                                   |                                     |
| HOMO-1          | -7.31       | 1  | 53     | 46     | 1                                   |                                     |
| HOMO-2          | -7.62       | 1  | 76     | 19     | 4                                   |                                     |
| HOMO-3          | -7.62       | 1  | 21     | 78     | 1                                   |                                     |
| 5 <sup>2+</sup> |             |    |        |        |                                     |                                     |
| Orbital         | Energy (eV) | Pt | pbt(1) | pbt(2) | pyraphen                            |                                     |
| LUMO+3          | -3.07       | 36 | 22     | 22     | 20                                  |                                     |
| LUMO+2          | -3.21       | 6  | 36     | 36     | 22                                  |                                     |
| LUMO+1          | -3.23       | 5  | 45     | 45     | 5                                   |                                     |
| LUMO            | -3.40       | 1  | 1      | 1      | 97                                  |                                     |
| HOMO            | -7.33       | 2  | 49     | 49     | 0                                   |                                     |
| HOMO-1          | -7.33       | 1  | 49     | 50     | 0                                   |                                     |
| HOMO-2          | -7.63       | 1  | 49     | 49     | 0                                   |                                     |
| HOMO-3          | -7.63       | 1  | 49     | 49     | 1                                   |                                     |

| $6^{2+}$ |             |    |        |        |                       |
|----------|-------------|----|--------|--------|-----------------------|
| Orbital  | Energy (eV) | Pt | pbt(1) | pbt(2) | NH <sub>2</sub> -phen |
| LUMO+5   | -2.22       | 32 | 28     | 27     | 13                    |
| LUMO+4   | -2.80       | 0  | 4      | 4      | 91                    |
| LUMO+3   | -3.01       | 40 | 28     | 27     | 5                     |
| LUMO+2   | -3.15       | 6  | 30     | 56     | 8                     |
| LUMO+1   | -3.17       | 5  | 47     | 28     | 20                    |
| LUMO     | -3.24       | 2  | 11     | 7      | 80                    |
| HOMO     | -6.69       | 0  | 0      | 0      | 99                    |
| HOMO-1   | -7.29       | 2  | 13     | 85     | 0                     |
| HOMO-2   | -7.30       | 1  | 86     | 13     | 0                     |
| HOMO-3   | -7.60       | 1  | 29     | 70     | 0                     |
| HOMO-4   | -7.61       | 1  | 70     | 29     | 1                     |
| HOMO-5   | -7.87       | 10 | 39     | 48     | 3                     |

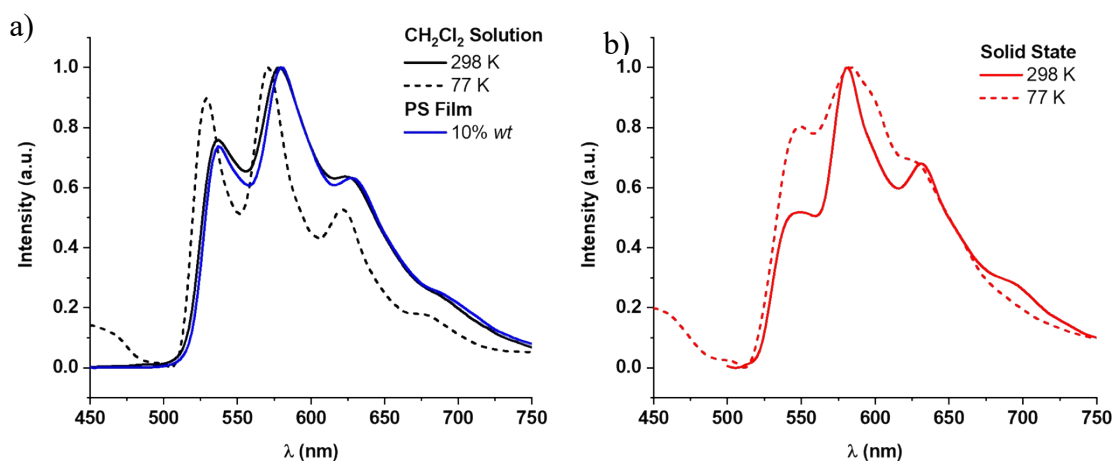

Figure S15. Emission spectra of the precursor **1** in several media.

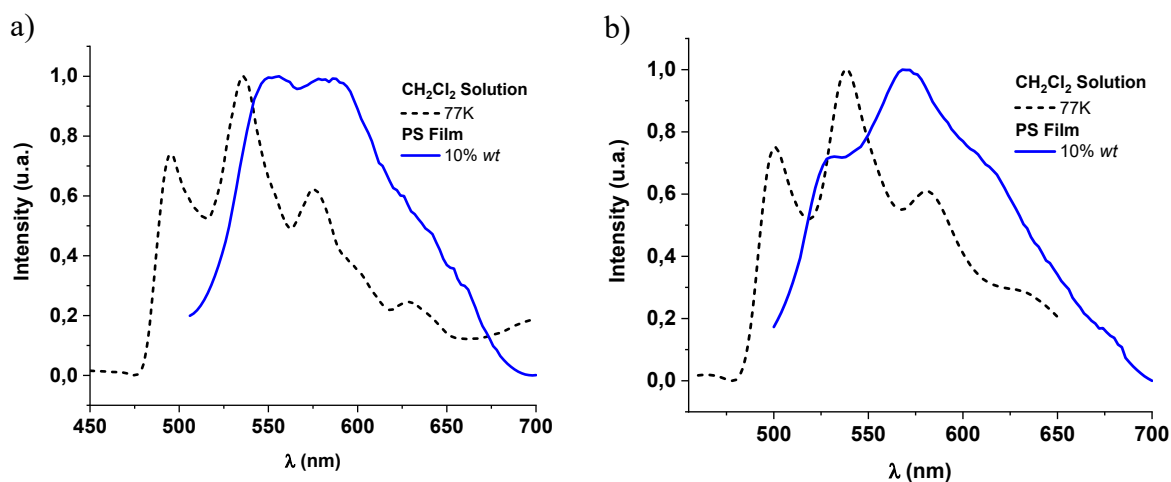

Figure S16. Emission spectra in CH<sub>2</sub>Cl<sub>2</sub> glasses (77 K) and PS film 10% wt of a) **4-PF<sub>6</sub>**, b) **5-PF<sub>6</sub>**

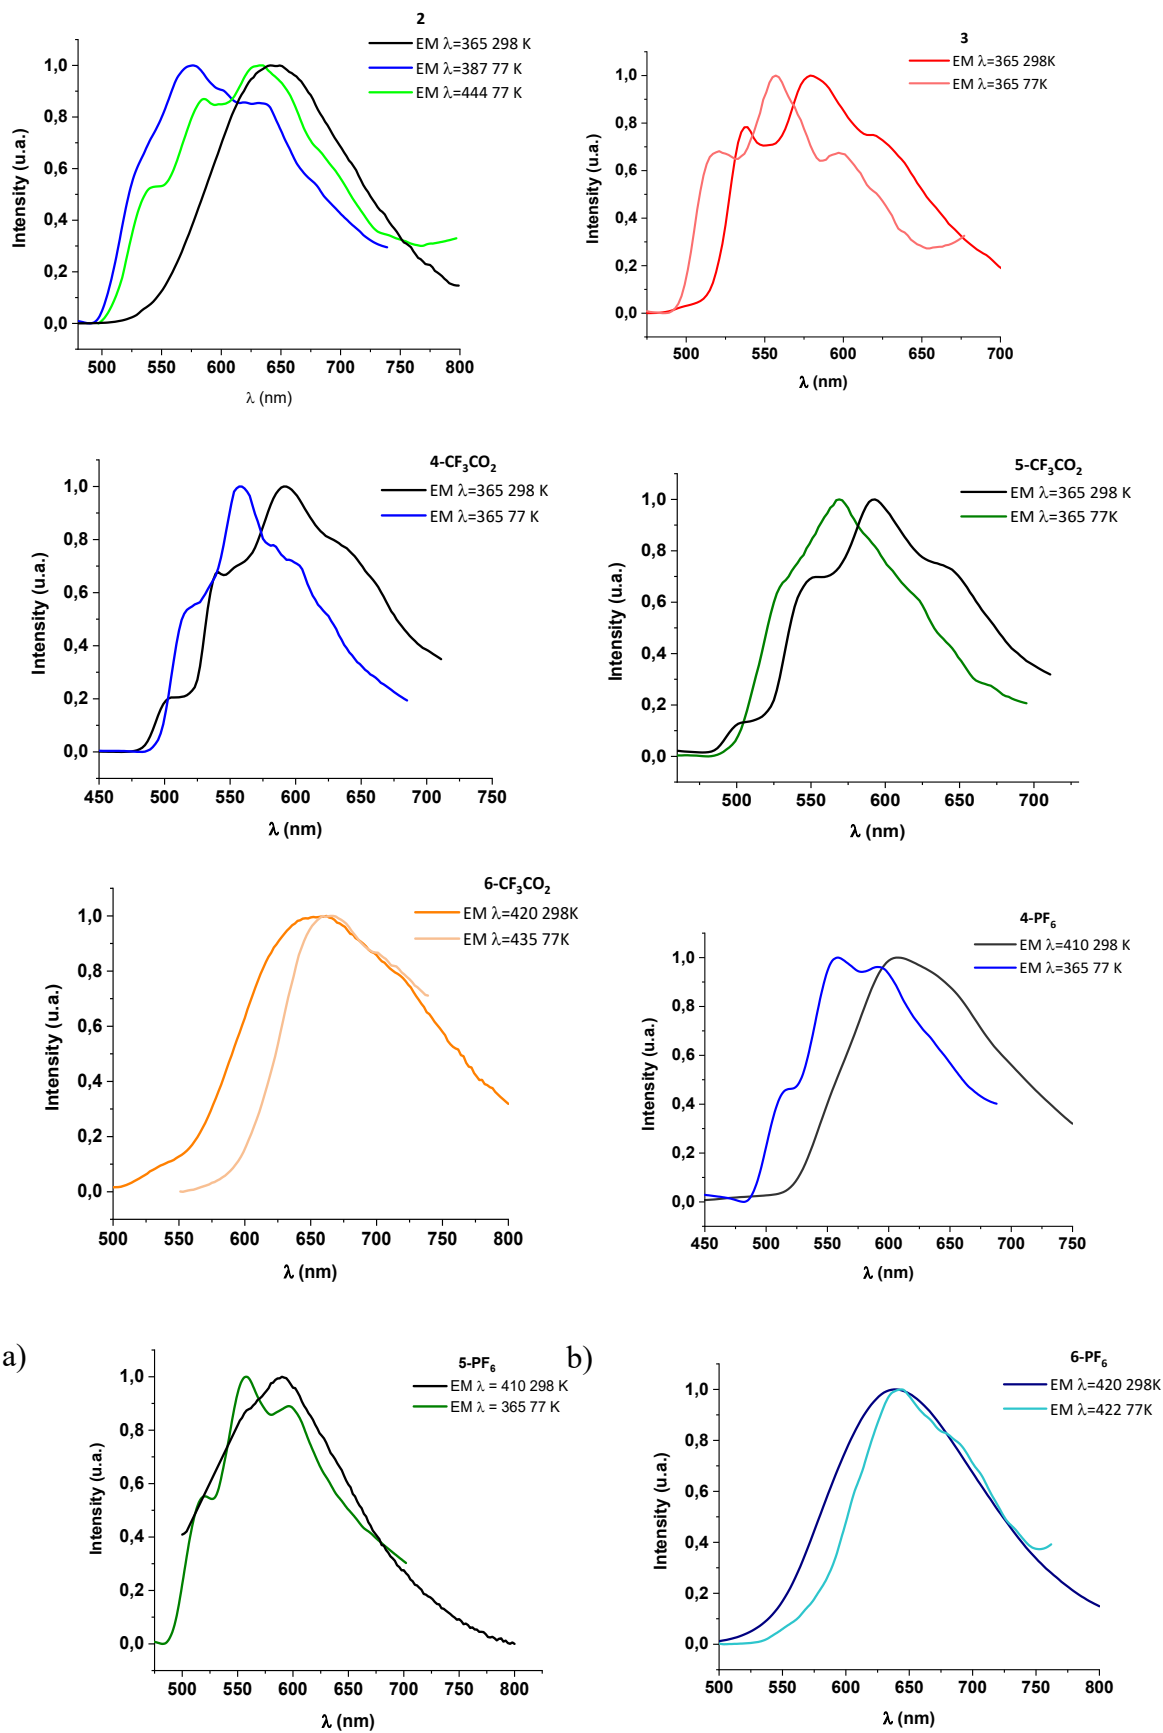

**Figure S17.** Emission and excitation spectra in solid state at 298 K, 77 K of a) **2**, b) **3**, c) **4-CF<sub>3</sub>CO<sub>2</sub>**, d) **5-CF<sub>3</sub>CO<sub>2</sub>**, e) **6-CF<sub>3</sub>CO<sub>2</sub>**, f) **4-PF<sub>6</sub>**, g) **5-PF<sub>6</sub>** and h) **6-PF<sub>6</sub>**.

**Table S7.** Plots and composition (%) of the frontier MOs and spin density of the first triplet state in CH<sub>2</sub>Cl<sub>2</sub>.

| <b>2</b>                                                                            |                                                                                     |                                                                                      |
|-------------------------------------------------------------------------------------|-------------------------------------------------------------------------------------|--------------------------------------------------------------------------------------|
| SOMO                                                                                | SOMO-1                                                                              | Spin density                                                                         |
| 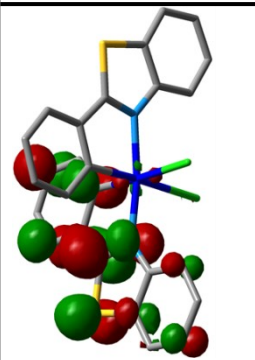   |    |    |
| -3.97eV<br>Pt 2 %, pbt(1) 96 %, pbt(2) 1 %<br>%, Cl(1) 0 %, Cl(2) 1 %               | -5.10 eV<br>Pt 2 %, pbt(1) 97 %, pbt(2) 0 %<br>%, Cl(1) 0 %, Cl(2) 0 %              | 0.014 on <b>Pt</b>                                                                   |
| <b>3</b>                                                                            |                                                                                     |                                                                                      |
| SOMO                                                                                | SOMO-1                                                                              | Spin density                                                                         |
|   |   |   |
| -4.17 eV<br>Pt 2 %, pbt(1) 0 %, pbt(2) 97 %<br>%, TFA(1) 0 %, TFA(2) 1 %            | -5.10 eV<br>Pt 2 %, pbt(1) 0 %, pbt(2) 96 %<br>%, TFA(1) 0 %, TFA(2) 1 %            | 0.0197 on <b>Pt</b>                                                                  |
| <b>4<sup>2+</sup></b>                                                               |                                                                                     |                                                                                      |
| SOMO                                                                                | SOMO-1                                                                              | Spin density                                                                         |
|  |  |  |
| -4.92 eV<br>Pt 2 %, pbt(1) 0 %, pbt(2) 96 %<br>%, phen 1 %                          | -6.21 eV<br>Pt 1 %, pbt(1) 0 %, pbt(2) 98 %<br>%, phen 1 %                          | 0.0128 on <b>Pt</b>                                                                  |

| $5^{2+}$                                                                    |                                                                             |                     |
|-----------------------------------------------------------------------------|-----------------------------------------------------------------------------|---------------------|
| SOMO                                                                        | SOMO-1                                                                      | Spin density        |
|                                                                             |                                                                             |                     |
| -4.94 eV<br>Pt 2 %, pbt(1) 96 %, pbt(2) 0 %<br>%, pyraphen 1 %              | -5.68 eV<br>Pt 1 %, pbt(1) 98 %, pbt(2) 0 %<br>%, pyraphen 0 %              | 0.0126 on <b>Pt</b> |
| $6^{2+}$                                                                    |                                                                             |                     |
| SOMO                                                                        | SOMO-1                                                                      | Spin density        |
|                                                                             |                                                                             |                     |
| -4.57 eV<br>Pt 1 %, pbt(1) 0 %, pbt(2) 0 %<br>%, NH <sub>2</sub> -phen 98 % | -5.23 eV<br>Pt 0 %, pbt(1) 0 %, pbt(2) 0 %<br>%, NH <sub>2</sub> -phen 99 % | 0.0004 on <b>Pt</b> |

**Table S8.** Theoretical calculated energies

|                                               | <b>2</b>     | <b>3</b> | <b>4<sup>2+</sup></b> | <b>5<sup>2+</sup></b> | <b>6<sup>2+</sup></b> |
|-----------------------------------------------|--------------|----------|-----------------------|-----------------------|-----------------------|
| $\lambda_{\text{ex}} (S_0 \rightarrow T_1)^a$ | 469          | 470      | 471                   | 471                   | 531                   |
| $\lambda_{\text{ex}} (S_0 \rightarrow T_2)^a$ | 469          | 469      | 471                   | 471                   | 514                   |
| $\lambda_{\text{ex}} (S_0 \rightarrow T_3)^a$ | 386          | 378      | 432                   | 411                   | 471                   |
| $\lambda_{\text{em}} (T_1)^b$                 | 679          | 685      | 670                   | 670                   | 739                   |
| $\lambda_{\text{em}} (T_2)^b$                 | 679          | 685      | 670                   | 653                   | 738                   |
| $\lambda_{\text{em}} (T_3)^b$                 | <sup>c</sup> | 439      | 600                   | 516                   | 669                   |

<sup>a</sup> Vertical excitation energy by TD-DFT calculations. <sup>b</sup>Emission wavelength calculated by the difference between the energies of the optimized triplet states and the singlet state at the triplet geometry. <sup>c</sup>Overestimated value surely by the great metallic contribution on this excited state.

**Table S9.** Electronic energies (Hartrees) of the optimized structures in CH<sub>2</sub>Cl<sub>2</sub> solution

| Complex               | <b>S<sub>0</sub></b> | <b>T<sub>1</sub></b> | <b>T<sub>2</sub></b> | <b>T<sub>3</sub></b> |
|-----------------------|----------------------|----------------------|----------------------|----------------------|
| <b>2</b>              | -2946.017677         | -2945.935085         | -2945.935085         | -2945.931475         |
| <b>3</b>              | -3077.970025         | -3077.887823         | -3077.887823         | -3077.857419         |
| <b>4<sup>2+</sup></b> | -2596.895257         | -2596.812512         | -2596.812512         | -2596.803149         |
| <b>5<sup>2+</sup></b> | -2782.615907         | -2782.533229         | -2782.533228         | -2782.512883         |
| <b>6<sup>2+</sup></b> | -2652.259441         | -2652.187012         | -2652.187011         | -2652.176758         |

## 5. Electrochemical Properties

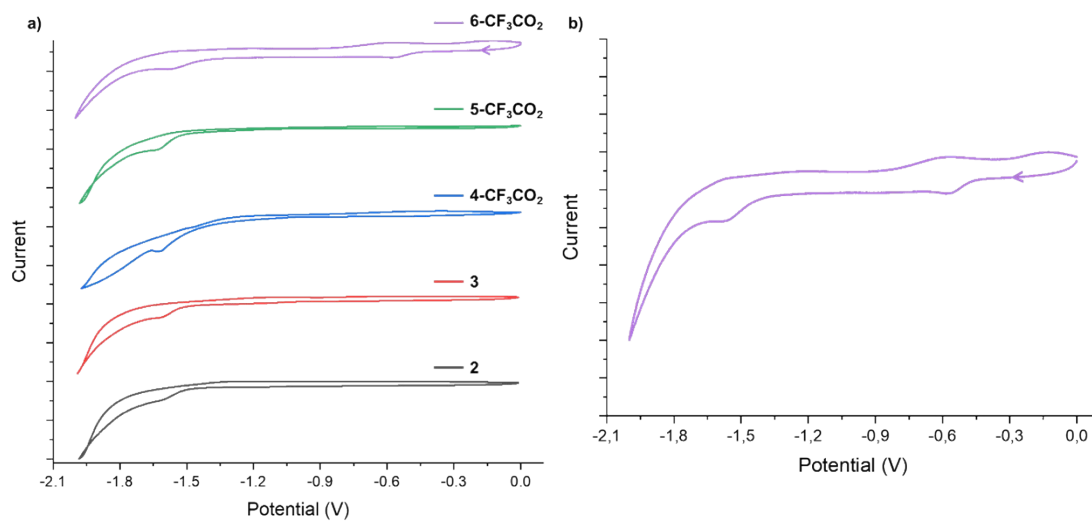

**Figure S18.** a) Cyclic voltammograms of the Pt<sup>IV</sup> complexes in CH<sub>2</sub>Cl<sub>2</sub> solution at 100 mVs<sup>-1</sup>. b) expanded CV of 6-CF<sub>3</sub>CO<sub>2</sub>.
